1 (Subclinical mastitis alters dairy cow behavior)

2

3 **Subclinical Mastitis in Dairy Cows is Associated with Changes in Salivary Serum**

4 **Amylase-A, Social Behavior and Activity Profiles**

5

6 **G. Caplen<sup>1\*</sup>, S. Held<sup>1</sup>**

7 [gina.caplen@bristol.ac.uk](mailto:gina.caplen@bristol.ac.uk); [suzanne.held@bristol.ac.uk](mailto:suzanne.held@bristol.ac.uk)

8 <sup>1</sup>Animal Welfare and Behaviour Group, Bristol Veterinary School, University of Bristol,

9 Langford, Bristol, BS40 5DU, UK

10 \*Corresponding author

11

12 **ABSTRACT**

13 The relationship between behavior and low-level, subclinical systemic inflammation was  
14 investigated in a group of matched-pair (sub-clinical mastitis, **SCM**, versus clinically healthy  
15 control, **CTRL**) intensively housed dairy cows (n = 34) over short (24h) distinct periods. We  
16 report, for the first time, that an increase in an inflammatory marker (salivary serum amylase-  
17 A, **SAA**) occurs during the early stages of a bovine disease. SAA was higher in SCM cows,  
18 and positively correlated with somatic cell count, the defining parameter of mastitis. SCM  
19 cows were observed to display reduced activity (behavioral transitions and distance moved),  
20 and reductions in several measures of social behavior including: social exploration, social  
21 reactivity (following the receipt of agonistic behavior), performance of social grooming and  
22 head butts, and the receipt of challenges. In addition, SCM cows received more head swipes,  
23 and spent a greater proportion of time lying with their head on their flank than CTRL cows.  
24 SCM cows also demonstrated a preference for lower-risk ‘within-herd feeding’; a greater  
25 proportion of time feeding was spent in direct contact with herd-members, and a lower  
26 proportion of time feeding was spent at self-locking feed barriers, than the CTRL cows. We  
27 also present evidence for diurnal differences in the daily behavioral routine between the two  
28 groups: SCM cows appear to shift their activity (social and otherwise) to quieter times of the  
29 day, a tactic that could actively avoid agonism. Many behavioral measures were found to  
30 correlate with SAA in a direction consistent with predictions for sickness behavior. We  
31 conclude that salivary SAA, social behavior and activity changes offer potential for use in the  
32 detection and monitoring of pre-clinical inflammatory disease states in cows.

33

34 **Keywords:** Cows; SAA; Sickness; Social behavior; Sub-clinical mastitis; Welfare

## 35 1. INTRODUCTION

36 Infectious disease is highly detrimental to animal welfare and can negatively impact dairy  
37 herd profitability via production losses and expensive treatment costs (Grohn et al., 2003;  
38 González et al., 2008). It is imperative that emerging health problems are identified and  
39 treated as soon as possible; however, low level inflammatory processes and early symptoms  
40 of sickness and disease are not easily recognised in any animal (Weary et al., 2006).  
41 Although no abnormalities in the gland or milk are visible during subclinical mastitis in  
42 cows, milk production drops, milk somatic cell counts (SCC) elevate, and inflammation  
43 (with or without an intramammary pathogen) occurs (Sordillo et al., 1997). In cows, effective  
44 health monitoring is further hampered by logistical difficulties associated with direct animal  
45 observations within large open barn systems, reductions in human interaction linked with the  
46 substantial uptake in robotic milking units, and the tendency of cattle (as a prey species) to  
47 display only subtle indicators of pain/weakness (Gleerup et al., 2015). Advances in image  
48 analysis now allow automated recognition of individual cows within a herd (Andrew et al.,  
49 2020), accurate identification of some health-related abnormal behaviors, e.g. foot disease  
50 (Gu et al., 2017), and detection of social interactions (Guzhva et al., 2016). The identification  
51 of behaviors associated with subclinical disease may therefore find application in future  
52 diagnostic software algorithms targeted at early disease monitoring in dairy cows (see e.g.  
53 Wagner et al. 2020).

54  
55 Sickness is an adaptive response to infection and inflammation, characterized by endocrine,  
56 autonomic, and behavioral change. Infection triggers the immune system to initiate a febrile  
57 response and reprioritise behavior (Hart, 1988; Dantzer et al., 2008). This process is mediated  
58 by pro-inflammatory cytokines acting upon the CNS (Dantzer and Kelley, 2007). ‘Sickness  
59 behavior’ is one such strategy to facilitate recovery, achieved via a reduction in physical  
60 activity (energy conservation) and the minimisation of heat loss. Sickness behaviors are  
61 useful for early disease detection (see reviews: Weary et al., 2009; von Keyserlingk and  
62 Weary, 2010). They include anorexia and withdrawal from the physical and social  
63 environment (Dantzer and Kelley, 2007; Tizard, 2008; Hart, 2010). Behavior in healthy  
64 animals can be thought of as being of two types in relation to fitness: ‘core maintenance’ (or  
65 ‘high-resilience’) with immediate, short-term benefits (e.g. sleep, feed, drink) and ‘luxury’  
66 (or ‘low-resilience’) with delayed, longer-term benefits (e.g. play, exploration, grooming)  
67 (Dawkins, 1990; Špinka et al., 2001; Weary et al. 2009). Due to the relative ease with which  
68 core behavior can be automatically monitored in dairy cows this has received most attention

69 to date. Changes in feeding behavior associated with bovine clinical disease, for example,  
70 have been used to predict ketosis (Gonzales et al., 2008), respiratory disease (**BRD**) (Toa  
71 Rosenstein and Tucker, 2018), clinical lameness (Gonzalez et al., 2008), metritis (Schirmann  
72 et al., 2016; Neave et al., 2018) and mastitis (Fogsgaard et al., 2012; Sepúlveda-Varas et al.,  
73 2014). However, because core behaviors are essential for short-term survival, they will only  
74 start to decline at relatively late disease stages (e.g. Littin et al., 2008) and have low  
75 sensitivity during the early stages (Sepúlveda-Varas et al., 2014). A change in low-resilience  
76 behaviors such as social exploration and interaction, however, could potentially flag disease  
77 sooner because their immediate importance is further diminished when the animal's energy  
78 resources are diverted to fight infection (Dawkins, 1990). We, therefore, here investigate  
79 whether any such changes are detectable in subclinical mastitis.

80

81 In cows, serum amyloid A (**SAA**), a non-specific inflammatory marker, primarily synthesised  
82 in the liver and readily measured in serum, is a key acute phase protein (**APP**) (Murata et al.,  
83 2004). APPs have demonstrated great utility in the identification of infectious disease.  
84 Increased SAA levels have been reported in cows with BRD (Joshi et al., 2018),  
85 reticuloperitonitis, metritis (Nazifi et al., 2008), and subclinical mastitis (Kovac et al., 2011;  
86 Nazifi et al., 2011; Kovacevi-Filipovic et al., 2012). A mammary isoform of SAA,  
87 synthesised by infected glands within the udder, is also upregulated in milk during sub-  
88 clinical mastitis (Eckersall et al., 2006; Kovac et al., 2011; Kovacevi-Filipovic et al., 2012).  
89 Although the main veterinary focus for salivary bioscience has been directed at companion  
90 animals (Prickett and Zimmerman, 2010; Cerón, 2019), enormous potential exists for non-  
91 invasive APP measurement in farm animal saliva; the presence of SAA in bovine saliva has  
92 been confirmed (Lecchi et al., 2012; Rahman et al., 2013). To date, very few studies have  
93 linked sickness behavior with physiological measures of inflammation in cattle. Des Roches  
94 et al. (2017) report correlations between pain indices (including attitude and attentiveness)  
95 and serum SAA prior to, and following, intra-mammary challenge with *E. coli*. A later study,  
96 utilising a similar mastitis model, identified lower mood (greater lethargy, dejection and  
97 suffering) in mastitic cows, and this was associated with clinical indicators and high SAA  
98 levels (des Roches et al., 2018).

99

100 The key aim of the current study was to identify any changes in SAA, social behavior and  
101 other behavioral signs of sickness associated with subclinical disease states (here mastitis) in  
102 dairy cows; this with a view to supporting early detection of disease and identification of

103 more chronic, subclinical, inflammation states. To this end we: (a) compared the behavior of  
104 cows with subclinical mastitis with matched healthy cows and, (b) correlated key behavioral  
105 measures with both milk SCC (as a measure of local infection severity) and salivary SAA (as  
106 a measure of systemic inflammation). We thus investigate for the first time whether SAA  
107 measurement in bovine saliva has the potential to detect systemic inflammation associated  
108 with a sub-clinical condition.

109

## 110 **2. MATERIALS AND METHODS**

### 111 **2.1. Ethics Statement**

112 The study was conducted between October 2017 and February 2018 at Bristol Veterinary  
113 School dairy farm. The experimental procedures were approved by the Animal Welfare and  
114 Ethical Review Board at the University of Bristol.

115

### 116 **2.2. Animals**

117 Focal cows (n = 34) were part of an indoor commercial Holstein-Friesian dairy herd (n =  
118 200) and resided within the low milk-yield group (approx. n = 80 cows) at the time of the  
119 study; having been part of the group for at least one month prior to data collection they were  
120 well-established within the social dominance hierarchy. Cows were housed within a free-stall  
121 barn; their section contained: 93 lying stalls with sand bedding, three drinking troughs, a  
122 swinging brush (DeLaval), automatic floor scrapers and vulcanized rubber floors in the front  
123 (feeding) alley. Cows were milked three times daily (the low yielders at 06:00, 14:00 and  
124 22:00h) and fed a total mixed ration once daily (06:00h). The feed passage was accessible via  
125 self-locking yokes (n = 42) and an open section of post-and-rail feed barrier. Only clinically  
126 healthy non-lame cows (mobility score  $\leq 1$ ; AHDB, 2015) were selected for inclusion within  
127 the study. To control for confounding effects (air temperature, reproductive status, parity, and  
128 stage of pregnancy) data were collected from cows in matched pairs, whereby each pair  
129 comprised one cow with subclinical mastitis (**SCM**) and a clinically healthy control (**CTRL**).  
130 Cows with a SCC of  $>200$  (x1000 cells/ml) were classified as SCM (Madouasse et al., 2010),  
131 while cows with a SCC of  $<100$  (x1000 cells/ml) were classified as CTRL. The focal group  
132 comprised pregnant (n = 24) and nonpregnant (n = 10) cows, primiparous (n = 20) and  
133 multiparous (parity of 2: n = 2; 3: n = 2; 4: n = 6; 5: n = 4) individuals, and the time to  
134 expected calving date ranged from 55 - 236 days.

135

### 136 **2.3. Somatic Cell Count**

137 Composite quarter milk samples were collected at the second (afternoon) milking on the day  
138 prior to behavioral observations (Day 1). Somatic cells were manually counted using a  
139 standard direct microscopic methodology (ISO 13366-1, 1997) following staining with  
140 Newman-Lampert stain solution: Levowitz-Weber modification (Newman's Stain Solution:  
141 modified, 01375, Sigma-Aldrich).

142

#### 143 **2.4. Behavioral Measures**

144 Each focal cow was fitted with a coloured collar to facilitate recognition (Day 1). Two CCTV  
145 systems (N441L1T, Annke®, CA 91748, US), including six cameras were used to record  
146 video footage from the entire low-yield pen. Continuous behavioral data were scored  
147 retrospectively from video for each focal cow for 24h starting from 00:00h (Day 2); all  
148 measures are described in Table 1. The following behaviors were not analysed individually  
149 but included within the measure of total behavioral transitions ('Trans'): eat sand, lick salt,  
150 paw sand, run, shake head, stand, and walk. Rumination was not logged as it proved difficult  
151 to definitively identify from the video footage. Tendencies for/against social proximity were  
152 investigated using nearest neighbour scores. When the focal cow was located at the feed  
153 barrier or resting within a cubicle the number of other cows (0, 1 or 2) in proximity were  
154 recorded. At the feed barrier proximity was defined as physical flank-to-flank contact. In a  
155 cubicle it was the occupation of (i.e. another cow recumbent within) an adjoining cubicle. To  
156 enable the calculation of distance moved ('Dist') the pen floorspace was hypothetically  
157 subdivided into 29 units (4.8 m wide); front and back passages were each divided into 13  
158 units (F1-13 and B1-13, respectively), in addition to three raised trough areas (M1, M7, M13,  
159 Figure 1). The location of each cow was recorded at 5 min scan intervals and 'Dist' was  
160 calculated as the number of units crossed within a specific time-period.

161

162 INSERT FIGURE 1 NERE HERE

163

164 Several different data sets were analysed. The main data set (**24h**) comprised all data for the  
165 24h observational period. Behavior associated with fresh feed delivery was examined using  
166 60 min of data collected from each cow immediately following their individual return to the  
167 home pen after first milking (**1hPostM1**). Diurnal differences in behavior between the two  
168 groups were assessed using hourly blocks of data for specific 'key' measures of interest  
169 (**Diurnal**). Data was not available for 06:00, 14:00 or 22:00h as the cows were in the milking  
170 parlour or collecting yard during these periods.

171 **Table 1:** Cow behavioral measures used within the study.

| Measure                    | Abbreviation – Definition                                                                                                                                                                                                                                   |
|----------------------------|-------------------------------------------------------------------------------------------------------------------------------------------------------------------------------------------------------------------------------------------------------------|
| (A.) Maintenance           |                                                                                                                                                                                                                                                             |
| Lie, s                     | 'Lie' <sup>c</sup> : horizontal resting position, with undercarriage or flank in contact with the floor. Includes 'rising'.                                                                                                                                 |
| Drink, s                   | 'Drink' <sup>b</sup> : ingestion of water at any of the three troughs.                                                                                                                                                                                      |
| Feed, s                    | 'Feed' <sup>c</sup> : actively ingest/chew food while at the feed barrier.                                                                                                                                                                                  |
| Head on flank, s           | 'HOF' <sup>b</sup> : lying with the head in contact with the flank, pointing backwards towards the rump. Associated with active sleep.                                                                                                                      |
| Brush, s                   | 'Brush' <sup>b</sup> : use of the mechanical brush for scratching/grooming.                                                                                                                                                                                 |
| Comfort, s                 | 'Comfort' <sup>b</sup> = 'Lick self' + 'Rub self' (rub self upon pen furniture) + 'Scratch self' (scratch self, using back foot).                                                                                                                           |
| Explore environment, s     | 'ExpEnv' <sup>c</sup> = 'Explore food' (sniff/nose food) + 'Explore pen' (sniff/lick any part of the barn) + 'Explore sand'.                                                                                                                                |
| Explore social, s          | 'ExpSoc' <sup>c</sup> = 'Explore cow' (sniff a conspecific - no reciprocation) + 'Mutual sniff' (reciprocal sniffing).                                                                                                                                      |
| (B.1) Social: Agonistic    | Each was further classified as being: given (G), received (R), received with displacement (+D). See 'Body push' for example.                                                                                                                                |
| Body push: give, n         | 'BPG' <sup>b</sup> : sideways shunt delivered by the flank, designed to displace a conspecific (e.g. to access feed barrier).                                                                                                                               |
| Body push: receive, n      | 'BPR' <sup>b</sup> : receipt of a body push.                                                                                                                                                                                                                |
| Body push: displacement, % | 'BPR+D': receipt of body push, immediately ( $\leq 2$ s) prompting the focal cow to be displaced.<br>'%BPR+D' <sup>a</sup> = ('BPR+D'/'BPR') x 100                                                                                                          |
| Challenge                  | 'CG' <sup>b</sup> : perform a threatening non-contact gesture, aimed at displacing a conspecific (e.g. short-charging, determinedly approaching, or facing/staring at a conspecific with head lowered). ['CR' <sup>b</sup> , 'CR+D', '%CR+D' <sup>a</sup> ] |
| Head butt                  | 'HBG' <sup>b</sup> : violently striking a conspecific (on the body or head) using the front of the lowered head, without reciprocation.<br>['HBR' <sup>b</sup> , 'HBR+D', '%HBR+D' <sup>a</sup> ]                                                           |
| Head push                  | 'HPG' <sup>b</sup> : using the head to gently push a conspecific's head/body. Usually observed as prolonged/sustained contact.<br>['HPR' <sup>b</sup> , 'HPR+D', '%HPR+D' <sup>a</sup> ]                                                                    |
| Head swipe                 | 'HSG' <sup>b</sup> : sideways swipe of the head often directed at a conspecific's head. Usually observed at the feed barrier.<br>['HSR' <sup>b</sup> , 'HSR+D', '%HSR+D' <sup>a</sup> ]                                                                     |
| Focal social: give, n      | 'FocSocG' <sup>c</sup> = 'BPG' + 'CG' + 'HBG' + 'HPG' + 'HSG'                                                                                                                                                                                               |

|                                      |                                                                                                                                                                                                                                                                                                                                      |
|--------------------------------------|--------------------------------------------------------------------------------------------------------------------------------------------------------------------------------------------------------------------------------------------------------------------------------------------------------------------------------------|
| Focal social: receive, n             | 'FocSocR' <sup>c</sup> = 'BPR' + 'CR' + 'HBR' + 'HPR' + 'HSR'                                                                                                                                                                                                                                                                        |
| Focal social: displacement, %        | '%FocSocR+D' <sup>a</sup> = [( 'BPR+D' + 'CR+D' + 'HBR+D' + 'HPR+D' + 'HSR+D' ) / 'FocSocR'] x 100                                                                                                                                                                                                                                   |
| Mutual head butt, n/s                | 'MutHdButt' <sup>b</sup> : mutual head butting between the focal cow and a conspecific.                                                                                                                                                                                                                                              |
| (B.2) Social: Other                  |                                                                                                                                                                                                                                                                                                                                      |
| Allogroom give, n/s                  | 'AlloG' <sup>b</sup> : licking a conspecific.                                                                                                                                                                                                                                                                                        |
| Allogroom receive, n/s               | 'AlloR' <sup>b</sup> : receipt of licks from a conspecific.                                                                                                                                                                                                                                                                          |
| Mutual head rub, n/s                 | 'MutHdRub' <sup>b</sup> : mutual head rubbing (head to head) by the focal cow and a conspecific.                                                                                                                                                                                                                                     |
| All social: give, n                  | 'SocG' <sup>c</sup> = 'AlloG' + 'BPG' + 'CG' + 'Chin rest give' (use of chin to exert pressure on the lateral posterior of a conspecific) + 'HBG' + 'HPG' + 'Head rub give' (rub head on a conspecific without reciprocation) + 'HSG' + 'Mount give' (rest chest floor on the back/rump of a conspecific) + 'MutHdButt' + 'MutHdRub' |
| All social: receive, n               | 'SocR' <sup>c</sup> = 'AlloR' + 'BPR' + 'CR' + 'Chin rest receive' + 'HBR' + 'HPR' + 'Head rub receive' + 'HSR' + 'Mount receive' + 'MutHdButt' + 'MutHdRub'                                                                                                                                                                         |
| (C.) Activity                        |                                                                                                                                                                                                                                                                                                                                      |
| Transitions, n                       | 'Trans' <sup>c</sup> : the total number of changes in behavior a focal cow undergoes during the observation period.                                                                                                                                                                                                                  |
| Distance, units                      | 'Dist' <sup>c</sup> : the number of units of floor space crossed by the focal cow during the observation period.                                                                                                                                                                                                                     |
| (D.) Social Proximity                |                                                                                                                                                                                                                                                                                                                                      |
| Feed barrier: all, s                 | 'FB_All': total time spent at the feed barrier.                                                                                                                                                                                                                                                                                      |
| Feed barrier: no near neighbour, %   | 'FB_0NN': time spent at the feed barrier when the focal cow was not in direct contact with any conspecific.<br>'%FB_0NN' <sup>a</sup> = ('FB_0NN' / 'FB_All') x 100                                                                                                                                                                  |
| Feed barrier: two near neighbours, % | 'FB_2NN': time spent at the feed barrier when the focal cow was in direct (flank to flank) contact with two conspecifics.<br>'%FB_2NN' <sup>a</sup> = ('FB_2NN' / 'FB_All') x 100                                                                                                                                                    |
| Lie: no near neighbours, %           | 'C_0NN': time spent lying while flanked by two unoccupied cubicles. '%C_0NN' <sup>a</sup> = ('C_0NN' / 'Lie') x 100                                                                                                                                                                                                                  |
| Lie: two near neighbours, %          | 'C_2NN': time spent lying while flanked by two occupied cubicles. '%C_2NN' <sup>a</sup> = ('C_2NN' / 'Lie') x 100                                                                                                                                                                                                                    |
| Feed barrier: open, %                | 'FB_Open': time spent at the open section of the feed barrier. '%FB_Open' <sup>a</sup> = ('FB_O' / 'FB_All') x 100                                                                                                                                                                                                                   |

172 <sup>a</sup>inclusion within 24h dataset only; <sup>b</sup>inclusion within 24h and 1hPostM1 datasets; <sup>c</sup>inclusion within 24h, 1hPostM1 and diurnal (hourly) datasets



173 To account for differences in total time visible (i.e. due to variations in time spent within the  
174 parlour) data in the ‘24h’ and ‘Diurnal’ data sets were standardised to either: number per hour  
175 visible (behavioral events) or seconds per hour visible (behavioral states). Outliers ( $\pm 2SD$ )  
176 were removed prior to data analysis.

177

## 178 **2.5. Saliva Collection and SAA**

179 Saliva was collected (Day 3) using a cotton swab (SalivaBio Children’s Swab, Item No.  
180 5001.06, Salimetrics) and then immediately stored at  $-80^{\circ}\text{C}$  prior to analysis. SAA was  
181 measured in saliva from 31 cows, diluted 1:2, using a commercially available kit (Bovine  
182 Serum amyloid A protein ELISA Kit, EB0015, Finetest®, Wuhan Fine Biotech Co. Ltd.). To  
183 assess the suitability of the kit for use with saliva an assay validation was performed. To  
184 determine parallelism (linearity) a displacement curve, produced by double-diluting a pooled  
185 saliva sample with assay buffer, was compared to a standard curve. Percentage binding (as a  
186 percentage of that recorded for the zero standard) was calculated, in addition to the Log of the  
187 standard concentration (SAA standard) and the Log of the inverse of the dilution factor  
188 (saliva sample), e.g. 1:4 was transformed to  $\text{Log}(1/4)$ . Parallelism was confirmed using a  
189 statistical test for the analysis of covariance (ANCOVA, SPSS). To measure assay accuracy  
190 the percentage recovery of exogenous SAA was calculated following the addition of 300  
191 ng/ml SAA standard to a pooled saliva sample. Precision was assessed via intra- and inter-  
192 assay coefficients of variation (**CV**); the former was determined following the repeated  
193 measurement of aliquots of pooled saliva containing either high (quality control: **QC<sub>high</sub>**) or  
194 low (**QC<sub>low</sub>**) endogenous SAA within the same plate, while the later was determined  
195 following the assay of **QC<sub>high</sub>** and **QC<sub>low</sub>** samples in different plates.

196

## 197 **2.6. Statistics**

198 Following tests for normality (Shapiro-Wilk analysis), comparisons between the CTRL and  
199 SCM groups were made for all behavioral and physiological measures (Paired samples t-test  
200 or Wilcoxon signed-rank tests, IBM SPSS Statistics 24.0). Since the experimental design  
201 required the performance of multiple comparisons between measures there was an increased  
202 associated risk of Type I errors. Use of Bonferroni correction procedures has been  
203 highlighted as problematic (especially for animal behavioral studies, where sample sizes are  
204 often small) due to their tendency to increase Type II errors (Nakagawa, 2004). As an  
205 alternative to standard correction procedures we, therefore, calculated measures of observed  
206 (standardised) effect size in addition to p-values. Effect size measures the strength/magnitude



207 of a relationship and, thereby, helps us to determine the strength of a statistical claim and  
208 whether a difference is real (i.e. it enables us to judge biological importance). Hedges' g-  
209 value (Equations 1 and 2), also termed 'Cohen's d-value for paired samples' (Hedges, 1981;  
210 Cohen, 1988; Nakagawa and Cuthill, 2007) and 95% confidence intervals (**CI**) for effect size  
211 (Equations 3 and 4), were calculated for all measures that met the assumptions of normality.

$$212 \quad g = \frac{\bar{x}_2 - \bar{x}_1}{\sigma_{\text{paired}}} \quad (1)$$

213 where

$$214 \quad \sigma_{\text{paired}} = \sqrt{\frac{(n_2 - 1)s_2^2 + (n_1 - 1)s_1^2}{n_1 + n_2 - 2}} \quad (2)$$

215

216  $\bar{x}_1$  and  $\bar{x}_2$  are the means of the two groups,  $\sigma_{\text{paired}}$  is the pooled standard deviation,  $n$  is the  
217 number of data points, and  $s^2$  is the sample variance.

218

$$219 \quad 95\% \text{CI} = g - 1.96se_g \text{ to } g + 1.96se_g \quad (3)$$

220 where

$$221 \quad se_g = \sqrt{\frac{2(1-r_{1,2})}{n} + \frac{g^2}{2(n-1)}} \quad (4)$$

222

223  $se_g$  is the asymptotic standard error for the effect size,  $n = n_1 = n_2$ , and  $r_{1,2}$  is the correlation  
224 coefficient between the two groups. For all behavioral measures that failed to meet the  
225 assumptions of normality, bootstrap effect size values (Hedges' g-value with 95%CI, R =  
226 2000) were computed using the software package 'bootES' (Gerlanc and Kirby, 2012; Kirby  
227 and Gerlanc, 2013) and R (Version 3.2.2., [www.r-project.org/](http://www.r-project.org/)). Effect size statistics were  
228 interpreted as follows: (a) the size of the effect (based upon the estimated g-values:  $\leq 0.39$  =  
229 small,  $0.40 - 0.79$  = medium,  $\geq 0.80$  = large); (b) statistical significance (attributed to all  
230 measures where the associated 95%CI did not contain '0') (Lee, 2016).

231

232 Interpretation of statistically non-significant p-values is possible using effect size confidence  
233 intervals in combination with the effect size (see Nakagawa and Foster, 2004). To identify  
234 measures that failed to reach statistical significance in the current study (24h data set) but that  
235 could potentially still be biologically important, we used information from pre-existing  
236 literature to set accepted relative difference levels (**RDL%**, Table 2).

237

238 **Table 2:** Summary of relative difference levels (RDL%), based upon previous literature, used to  
239 ascertain the existence of a biological difference between two groups of cow (CTRL and SCM) for  
240 the different behavioral measures

| Behavioral Measure                       | RDL% | Reference                                      |
|------------------------------------------|------|------------------------------------------------|
| %FB_Open                                 | 10   | Huzzey et al., 2006                            |
| %FB_0NN, %FB_2NN                         | 20   | Manson and Appleby, 1990                       |
| Feed                                     | 10   | Dollinger and Kaufmann, 2013                   |
| Drink                                    | 20   | Huzzey et al., 2007                            |
| Lie                                      | 10   | Toaff Rosenstein et al., 2016                  |
| Activity: Trans, Dist                    | 10   | King et al., 2018; Steensels et al., 2017      |
| Brush                                    | 30   | Mandel et al., 2017                            |
| Comfort                                  | 20   | Fogsgaard et al., 2012                         |
| AlloG                                    | 30   | Galindo and Broom, 2002                        |
| AlloR                                    | 80   | Galindo and Broom, 2002; Hoonhout et al., 2017 |
| Agonistic social give: all categories    | 10   | Sepulveda-Vares et al., 2016                   |
| Agonistic social receive: all categories | 10   | Neave et al., 2018                             |
| Other                                    | 20   |                                                |

241  
242 For those measures where no relevant literature was available, an RDL% of 20% was  
243 employed; this was the average of our other RDL% levels. For each measure, relative  
244 difference values (**RDV**) were then calculated using the RDL% and the respective mean  
245 value from the CTRL group. 95%CI<sub>RDV</sub> were calculated using the confidence intervals from  
246 the effect size statistics and the (between-group) difference in means. In those cases where  
247 the 95%CI<sub>RDV</sub> did not include the RDV, we conclude (with 95% confidence) that the current  
248 study showed no important biological effect for that measure; we refer to these as  
249 ‘biologically unimportant’. In cases where the 95%CI<sub>RDV</sub> did include the RDV, we conclude  
250 that a difference was inconclusive but plausible; we refer to these as ‘biologically  
251 inconclusive’. For example, if CTRL cows performed more body pushes than the SCM cows,  
252 yet this difference failed to reach statistical significance ( $P \geq 0.10$ ), using p-value alone we  
253 would dismiss this behavior as being unaffected by subclinical inflammation. However, if the  
254 RDV for this behavior was within the 95%CI<sub>RDV</sub> range (e.g. RDV = 0.08, 95%CI<sub>RDV</sub> = -0.08  
255 to 0.27) we can conclude that, although this effect is biologically inconclusive based upon our  
256 evidence, the difference may become significant given a larger sample size. Alternatively, if  
257 the RDV, in the above example, was 0.3, then we would conclude that the effect was  
258 biologically unimportant. To identify correlations between physiological (SCC and SAA) and

259 behavioral measures (24h data set) we performed curve estimation regression statistics  
 260 (SPSS: ANOVA, coefficient of determination).

261

### 262 3. RESULTS

#### 263 3.1. Behavioral Differences

##### 264 3.1.1. Core behavior

265 Paired t-tests suggested no significant differences in time spent feeding (**'Feed'**), drinking  
 266 (**'Drink'**), or lying (**'Lie'**) between SCM and CTRL groups (Tables 3 and 4), nor was  
 267 subclinical mastitis considered to have biologically significant effects on these core  
 268 maintenance behaviors (**'Feed'**: RDV = 82.39 s, 95%CI<sub>RDV</sub> = -0.03 to 0.03 s; **'Drink'**: RDV  
 269 = 6.86 s, 95%CI<sub>RDV</sub> = -1.33 to 3.99 s; **'Lie'**: RDV = 200.19 s, 95%CI<sub>RDV</sub> = -23.54 to 79.67 s).  
 270 Over the 24h period SCM cows spent more time lying with their head on their flank than  
 271 CTRL cows (**'HOF'**, Paired t-test: p = 0.046; Hedges' g: significant medium effect). CTRL  
 272 cows were more active, performing more behavioral transitions (**'Trans'** 24h, p = 0.040;  
 273 large; 1hPostM1, p = 0.041; large) and moving over a greater distance than the SCM cows  
 274 (**'Dist'**: 24h, p = 0.032, large; 1hPostM1, p = 0.098; medium).

275

276 **Table 3:** Measures of core behavior in two groups of cow (CTRL: n = 17; SCM: n = 17) over 24h. All  
 277 units transformed to 'per hour visible'

| Measure                  | CTRL                 |        | SCM                  |        | Effect size statistics |              |                |
|--------------------------|----------------------|--------|----------------------|--------|------------------------|--------------|----------------|
|                          | Mean                 | SD     | Mean                 | SD     | Hedges' g              | 95%CI        | Size of effect |
| Lie <sup>1</sup> , s     | 2001.93 <sup>a</sup> | 211.62 | 2092.46 <sup>a</sup> | 367.64 | -0.31                  | -0.26 - 0.88 | Small, ns      |
| HOF <sup>1</sup> , s     | 143.48 <sup>a</sup>  | 49.74  | 178.67 <sup>b</sup>  | 74.84  | -0.57                  | 0.06 - 1.09  | Med, sig       |
| Drink <sup>1</sup> , s   | 34.32 <sup>a</sup>   | 12.16  | 30.16 <sup>a</sup>   | 14.64  | 0.32                   | -0.32 - 0.96 | Small, ns      |
| Feed <sup>1</sup> , s    | 823.87 <sup>a</sup>  | 167.46 | 823.80 <sup>a</sup>  | 281.18 | 0.00                   | -0.46 - 0.46 | Small, ns      |
| Trans <sup>1</sup> , n   | 55.59 <sup>a</sup>   | 8.24   | 48.55 <sup>b</sup>   | 7.80   | 0.91                   | 0.08 - 1.74  | Large, sig     |
| Dist <sup>1</sup> , unit | 8.20 <sup>a</sup>    | 1.88   | 6.75 <sup>b</sup>    | 1.49   | 0.88                   | 0.11 - 1.65  | Large, sig     |
| Comfort <sup>1</sup> , s | 21.16 <sup>a</sup>   | 7.94   | 26.00 <sup>a</sup>   | 10.77  | -0.27                  | -0.58 - 1.12 | Small, ns      |
| ExpEnv <sup>1</sup> , s  | 55.38 <sup>a</sup>   | 20.87  | 49.96 <sup>a</sup>   | 14.45  | 0.31                   | -0.24 - 0.86 | Small, ns      |
| Brush <sup>2</sup> , s   | 28.99 <sup>a</sup>   | 43.87  | 11.85 <sup>a</sup>   | 9.01   | 0.53                   | -0.16 - 0.96 | Med, ns        |

278 <sup>a-b</sup>Mean values in the same row with different superscripts differ (P <0.05)

279 <sup>1</sup>Statistical analysis performed using Paired t-test

280 <sup>2</sup>Statistical analysis performed using Wilcoxon SR test

281

282 Although SCM cows tended only to perform statistically more **'Comfort'** behavior following  
 283 morning milking (1hPostM1: p = 0.073, medium), confidence intervals for effect size

284 differences classified both measures of self-grooming to be biologically inconclusive over  
 285 24h ('Brush': RDV = 8.70 s, 95%CI<sub>RDV</sub> = -2.74 to 16.45 s; 'Comfort': RDV = 4.23 s,  
 286 95%CI<sub>RDV</sub> = -2.81 to 5.42 s). This indicates that, given a larger sample size, significant  
 287 differences may have become apparent (i.e. higher brush use by CTRL cows and more  
 288 comfort behavior by SCM cows). No difference in environmental exploration was evident  
 289 between the groups over the 24h period, nor was this deemed to be biologically important in  
 290 the context of this study ('ExpEnv': RDV = 11.08 s, 95%CI<sub>RDV</sub> = -1.30 to 4.66 s); however,  
 291 CTRL cows did explore their environment more than SCM cows 1hPostM1 ('ExpEnv': p =  
 292 0.031, large).

293

294 **Table 4:** Measures of maintenance behavior in two groups of cow (CTRL: n = 17; SCM: n = 17)  
 295 during 60 mins following morning milking (1hPostM1)

| Measure                  | Control            |       | SCM                |       | Effect size statistics |              |                |
|--------------------------|--------------------|-------|--------------------|-------|------------------------|--------------|----------------|
|                          | Mean               | SD    | Mean               | SD    | Hedges' g              | 95%CI        | Size of effect |
| Dist <sup>1</sup> , unit | 15.87 <sup>a</sup> | 6.57  | 12.53 <sup>b</sup> | 4.03  | -0.63                  | -0.08 - 1.34 | Med, ns        |
| Comfort <sup>1</sup> , s | 29.20 <sup>a</sup> | 25.61 | 47.40 <sup>b</sup> | 44.15 | 0.52                   | 0.01 - 1.03  | Med, sig       |
| ExpEnv <sup>1</sup> , s  | 71.81 <sup>a</sup> | 44.15 | 39.31 <sup>c</sup> | 27.79 | -0.91                  | 0.11 - 1.71  | Large, sig     |
| Trans <sup>2</sup> , n   | 99.13 <sup>a</sup> | 34.79 | 71.67 <sup>c</sup> | 24.58 | -0.89                  | 0.21 - 1.62  | Large, sig     |

296 <sup>a-c</sup>Mean values in the same row with different superscripts differ (<sup>b</sup>P<0.10; <sup>c</sup>P<0.05)

297 <sup>1</sup>Statistical analysis performed using Paired t-test

298 <sup>2</sup>Statistical analysis performed using Wilcoxon SR test

299

### 300 3.1.2. Social behavior and pen-mate proximity

301 No differences were observed in the overall performance (24h), or receipt, of social behavior  
 302 between groups (Tables 5 and 6). Overall performance of cumulative social behavior was  
 303 classified as biologically unimportant in the context of this dataset, while receipt of social  
 304 behavior was biologically inconclusive ('SocG': RDV = 0.50, 95%CI<sub>RDV</sub> = -0.26 to 0.43;  
 305 'SocR': RDV = 0.44, 95%CI<sub>RDV</sub> = -0.21 to 0.64). CTRL cows performed more social  
 306 exploration ('ExpSoc': 24h, p = 0.009, large; 1hPostM1, p = 0.026, medium), more head  
 307 butts ('HBG': 24h, p = 0.043; 1hPostM1, p = 0.055, medium) and more head pushes  
 308 ('HPG': 1hPostM1, p = 0.027, large) than the SCM cows. Confidence intervals classified all  
 309 other agonistic measures which failed to reach statistical significance as being biologically  
 310 inconclusive ('FocSocG': RDV = 0.40, 95%CI<sub>RDV</sub> = -0.31 to 0.73; 'BPG': RDV = 0.08,  
 311 95%CI<sub>RDV</sub> = -0.08 to 0.27; 'CG': RDV = 0.02, 95%CI<sub>RDV</sub> = 0.00 to 0.15; 'HPG': RDV =  
 312 0.03, 95%CI<sub>RDV</sub> = -0.03 to 0.18; 'HSG': RDV = 0.17, 95%CI<sub>RDV</sub> = -0.12 to 0.63).

313

314 **Table 5:** Measures of social behavior recorded from two groups of cow (CTRL: n = 17; SCM: n = 17)

315 over 24h. All units (except %) transformed to ‘per hour visible’.

| Measure                     | CTRL               |       | SCM                |       | Effect Size Statistics |              |                |
|-----------------------------|--------------------|-------|--------------------|-------|------------------------|--------------|----------------|
|                             | Mean               | SD    | Mean               | SD    | Hedges' g              | 95%CI        | Size of effect |
| ExpSoc <sup>1</sup> , s     | 18.66 <sup>a</sup> | 12.26 | 9.14 <sup>c</sup>  | 5.40  | 1.04                   | 0.30 – 1.78  | Large, sig     |
| BPR <sup>1</sup> , n        | 0.83 <sup>a</sup>  | 0.29  | 0.79 <sup>a</sup>  | 0.38  | 0.11                   | -0.31 – 0.53 | Small, ns      |
| CG <sup>1</sup> , n         | 0.23 <sup>a</sup>  | 0.24  | 0.11 <sup>b</sup>  | 0.12  | 0.62                   | -0.01 - 1.25 | Med, ns        |
| CR <sup>1</sup> , n         | 0.32 <sup>a</sup>  | 0.25  | 0.17 <sup>c</sup>  | 0.10  | 0.84                   | 0.02 - 1.66  | Large, sig     |
| HBG <sup>1</sup> , n        | 1.07 <sup>a</sup>  | 0.87  | 0.64 <sup>c</sup>  | 0.41  | 0.65                   | 0.10 - 1.20  | Med, sig       |
| HBR <sup>1</sup> , n        | 0.70 <sup>a</sup>  | 0.38  | 0.59 <sup>a</sup>  | 0.26  | 0.37                   | -0.45 – 1.19 | Small, ns      |
| %HBR+D <sup>1</sup> , %     | 69.85 <sup>a</sup> | 15.51 | 52.66 <sup>c</sup> | 16.78 | 1.10                   | 0.46 - 1.74  | Large, sig     |
| HPR <sup>1</sup> , n        | 0.23 <sup>a</sup>  | 0.20  | 0.12 <sup>b</sup>  | 0.15  | 0.64                   | -0.01 – 1.29 | Med, ns        |
| HSG <sup>1</sup> , n        | 1.73 <sup>a</sup>  | 0.84  | 2.26 <sup>a</sup>  | 1.41  | -0.47                  | -0.23 – 1.18 | Med, ns        |
| HSR <sup>1</sup> , n        | 1.39 <sup>a</sup>  | 0.90  | 2.01 <sup>b</sup>  | 1.50  | -0.51                  | 0.01 – 1.02  | Med, sig       |
| %HSR+D <sup>1</sup> , %     | 32.88 <sup>a</sup> | 13.32 | 24.71 <sup>c</sup> | 13.59 | 0.63                   | 0.03 - 1.22  | Med, sig       |
| FocSocG <sup>1</sup> , n    | 3.98 <sup>a</sup>  | 2.59  | 3.33 <sup>a</sup>  | 1.47  | 0.32                   | -0.48 - 1.12 | Small, ns      |
| FocSocR <sup>1</sup> , n    | 3.41 <sup>a</sup>  | 1.17  | 3.85 <sup>a</sup>  | 1.84  | -0.30                  | -0.30 – 0.90 | Small, ns      |
| AlloG <sup>1</sup> , s      | 18.17 <sup>a</sup> | 13.97 | 10.09 <sup>c</sup> | 9.65  | 0.70                   | 0.05 – 1.35  | Med, sig       |
| SocR <sup>1</sup> , n       | 4.40 <sup>a</sup>  | 1.06  | 5.03 <sup>a</sup>  | 2.49  | -0.34                  | -0.34 – 1.02 | Small, ns      |
| %FB_0NN <sup>1</sup> , %    | 41.41 <sup>a</sup> | 12.91 | 36.01 <sup>b</sup> | 13.02 | 0.43                   | -0.02 – 0.88 | Med, ns        |
| %FB_2NN <sup>1</sup> , %    | 24.59 <sup>a</sup> | 9.72  | 30.02 <sup>c</sup> | 9.77  | -0.56                  | 0.11- 1.01   | Med, sig       |
| %FB_Open <sup>1</sup> , %   | 82.22 <sup>a</sup> | 11.97 | 90.14 <sup>c</sup> | 7.66  | -0.81                  | 0.10 - 1.53  | Large, sig     |
| %C_0NN <sup>1</sup> , %     | 38.75 <sup>a</sup> | 20.29 | 35.82 <sup>a</sup> | 20.66 | 0.43                   | -0.02 – 0.88 | Med, ns        |
| BPG <sup>2</sup> , n        | 0.83 <sup>a</sup>  | 0.82  | 0.53 <sup>a</sup>  | 0.32  | 0.47                   | -0.25 – 0.90 | Med, ns        |
| %BPR+D <sup>2</sup> , %     | 51.54 <sup>a</sup> | 14.04 | 53.68 <sup>a</sup> | 17.90 | -0.11                  | -0.53 – 0.85 | Small, ns      |
| %CR+D <sup>2</sup> , %      | 84.44 <sup>a</sup> | 13.39 | 76.85 <sup>a</sup> | 23.25 | 0.39                   | -0.32 – 1.10 | Small, ns      |
| HPG <sup>2</sup> , n        | 0.30 <sup>a</sup>  | 0.41  | 0.13 <sup>a</sup>  | 0.13  | 0.52                   | -0.15 - 1.04 | Med, ns        |
| %HPR+D <sup>2</sup> , %     | 52.79 <sup>a</sup> | 25.53 | 22.31 <sup>c</sup> | 35.00 | 0.96                   | -0.02 – 2.23 | Large, ns      |
| %FocSocR+D <sup>2</sup> , % | 49.10 <sup>a</sup> | 11.07 | 39.08 <sup>c</sup> | 11.56 | 0.87                   | 0.11 – 1.63  | Large, sig     |
| MutHdButt <sup>2</sup> , s  | 11.32 <sup>a</sup> | 11.93 | 5.33 <sup>a</sup>  | 3.99  | 0.66                   | -0.03 - 1.34 | Med, ns        |
| AlloR <sup>2</sup> , s      | 13.77 <sup>a</sup> | 11.36 | 15.88 <sup>a</sup> | 14.70 | -0.16                  | -0.54 – 0.79 | Small, ns      |
| SocG <sup>2</sup> , n       | 5.02 <sup>a</sup>  | 2.50  | 4.53 <sup>a</sup>  | 2.22  | 0.20                   | -0.53 – 0.87 | Small, ns      |
| %C_2NN <sup>2</sup> , %     | 21.90 <sup>a</sup> | 19.63 | 18.58 <sup>a</sup> | 20.56 | 0.08                   | -0.81 - 0.58 | Small, ns      |

316 <sup>a-c</sup>Mean values in the same row with different superscripts differ (<sup>b</sup>P<0.10; <sup>c</sup>P <0.05)

317 <sup>1</sup>Statistical analysis performed using Paired t-test

318 <sup>2</sup>Statistical analysis performed using Wilcoxon SR test

319

320 **Table 6:** Measures of social behavior observed between two groups of cow (CTRL: n = 17; SCM: n =  
321 17) during 60 mins following morning milking (1hPostM1)

| Measure                  | Control            |       | SCM               |      | Effect Size Statistics |              |                |
|--------------------------|--------------------|-------|-------------------|------|------------------------|--------------|----------------|
|                          | Mean               | SD    | Mean              | SD   | Hedges' g              | 95%CI        | Size of effect |
| FocSocG <sup>1</sup> , n | 10.69 <sup>a</sup> | 9.02  | 5.81 <sup>b</sup> | 4.68 | -0.70                  | -0.05 – 1.45 | Med, ns        |
| FocSocR <sup>1</sup> , n | 4.67 <sup>a</sup>  | 2.64  | 2.47 <sup>c</sup> | 1.92 | -0.99                  | 0.04 – 1.93  | Large, sig     |
| ExpSoc <sup>2</sup> , s  | 21.19 <sup>a</sup> | 28.75 | 6.50 <sup>c</sup> | 7.63 | -0.68                  | 0.06 – 1.07  | Med, sig       |
| BPR <sup>2</sup> , n     | 3.25 <sup>a</sup>  | 2.52  | 1.19 <sup>c</sup> | 1.47 | -0.98                  | 0.29 – 1.67  | Large, sig     |
| HBG <sup>2</sup> , n     | 1.69 <sup>a</sup>  | 2.44  | 0.50 <sup>b</sup> | 0.63 | -0.65                  | 0.10 – 1.09  | Med, sig       |
| HBR <sup>2</sup> , n     | 1.13 <sup>a</sup>  | 1.41  | 0.31 <sup>b</sup> | 0.60 | -0.73                  | 0.10 – 1.40  | Med, sig       |
| HPG <sup>2</sup> , n     | 0.94 <sup>a</sup>  | 1.29  | 0.13 <sup>c</sup> | 0.34 | -0.84                  | 0.24 – 1.38  | Large, sig     |
| AlloR <sup>2</sup> , s   | 37.56 <sup>a</sup> | 66.11 | 1.88 <sup>c</sup> | 3.18 | -0.74                  | 0.44 – 1.11  | Med, sig       |
| SocR <sup>2</sup> , n    | 12.13 <sup>a</sup> | 7.43  | 6.60 <sup>c</sup> | 3.92 | -0.91                  | 0.17 – 1.51  | Large, sig     |

322 <sup>a-c</sup>Mean values in the same row with different superscripts differ (<sup>b</sup>P<0.10; <sup>c</sup>P <0.05)

323 <sup>1</sup>Statistical analysis performed using Paired t-test

324 <sup>2</sup>Statistical analysis performed using Wilcoxon SR test

325

326 In the hour after first milking (1hPostM1) CTRL cows received significantly more social  
327 behavior ('SocR': p = 0.038, large), agonistic behavior ('FocSocR': p = 0.049, large), body  
328 pushes ('BPR': p = 0.022, large) and head butts ('HBR': p = 0.080, medium) than SCM  
329 cows. Overall (24h), CTRL cows also received more challenges ('CR': p = 0.050, large),  
330 while SCM cows received more head swipes ('HSR': p = 0.070, medium). With the  
331 exception of 'BPR', which was classified as biologically unimportant ('BPR': RDV = 0.08,  
332 95%CI<sub>RDV</sub> = -0.01 - 0.02), all other measures that failed to reach statistical significance were  
333 deemed to be biologically inconclusive ('HBR': RDV = 0.07, 95%CI<sub>RDV</sub> = -0.05 to 0.13;  
334 'HPR': RDV = 0.02, 95%CI<sub>RDV</sub> = -0.00 to 0.14; 'FocSocR': RDV = 0.34, 95%CI<sub>RDV</sub> = -0.13  
335 to 0.40; 'MutHdButt': RDV = 1.13 s, 95%CI<sub>RDV</sub> = -0.19 to 8.03 s).

336

337 CTRL cows were more reactive, i.e. more likely to be displaced, than SCM cows following  
338 the receipt of agonistic behavior cumulatively ('%FocSocR+D': p = 0.010, large), a head  
339 butt ('%HBR+D': p <0.001, large), head push ('%HPR+D': p = 0.037, large), or a head  
340 swipe ('%HSR+D': p = 0.048, medium). All reactivity measures that failed to reach  
341 statistical significance were classified as biologically unimportant in the context of this study  
342 ('%BPR+D': RDV = 5.15%, 95%CI<sub>RDV</sub> = -1.13 to 1.82%; '%CR+D': RDV = 8.44%,  
343 95%CI<sub>RDV</sub> = -2.43 to 8.35%). Although CTRL cows were observed to allogroom  
344 significantly more than SCM cows during the 24h period ('AlloG': p = 0.047, medium), no

345 overall difference in the receipt of allogrooming was evident, and this measure was classified  
346 as biologically unimportant ('**AlloR**': RDV = 11.02 s, 95%CI<sub>RDV</sub> = -1.14 to 1.67 s). CTRL  
347 cows were allogroomed more than SCM cows 1hPostM1 (p = 0.012, medium).

348

349 SCM cows spent a significantly greater proportion of their time at the feed passage flanked  
350 by two neighbours ('%**FB\_2NN**': p = 0.019, medium), and a significantly greater proportion  
351 of their time at the open section of the feed barrier ('%**FB\_Open**': p = 0.032, large), than did  
352 the CTRL cows. All other measures of social proximity were classified as biologically  
353 unimportant within the context of this study ('%**FB\_0NN**': RDV = 8.28%, 95%CI<sub>RDV</sub> = -0.11  
354 to 4.75%; '%**C\_0NN**': RDV = 7.75%, 95%CI<sub>RDV</sub> = -0.06 to 2.58%; '%**C\_2NN**': RDV:  
355 4.38%, 95%CI<sub>RDV</sub> = -2.69 to 1.93%).

356

### 357 **3.2. Differences in Diurnal Behavior Patterns**

358 A combination of paired-sample and post-hoc (effect size statistic) testing between the two  
359 groups revealed differences in diurnal patterns of activity and social behavior (Figure 2). The  
360 SCM cows were more active between: (a) 00:00 and 01:00h, when they performed more  
361 exploratory behavior and moved over a greater distance than the CTRL cows, and (b) 13:00  
362 and 14:00h, when they performed more exploratory and social behavior. CTRL cows were  
363 more active than the SCM cows during three periods: (a) between 02:00 and 03:00h they  
364 performed more social exploration, received more social behavior, and walked a greater  
365 distance, (b) during 05:00 to 06:00h they lay less, moved further, and performed more  
366 behavioral transitions, exploratory, and agonistic behavior, and (c) between 16:00 and 17:00h  
367 they performed more behavioral transitions and performed/received more agonistic behavior.

368

369 INSERT FIGURE 2 NEAR HERE

370

### 371 **3.3. Correlations Between Physiology and Behavior**

#### 372 **3.3.1. Assay validation**

373 Parallelism ( $F_{1,9} = 3.46$ ,  $p > 0.05$ ) was confirmed between serial dilutions of saliva (range: 1:4  
374 to 1:64) and SAA standards (range: 0, 9.38, 18.75, 37.5, 75, 150, 300 ng/ml), indicating that  
375 the ELISA kit was suitable for use with bovine saliva. Recovery of 300 ng/ml SAA from a  
376 spiked saliva sample was  $93.76 \pm 4.63\%$  (n = 10). The intra-assay CV was 3.09% ( $250.87 \pm$   
377  $7.75$  ng/ml, n = 10) for QC<sub>low</sub> and 4.68% ( $1360.33 \pm 63.70$  ng/ml, n = 10) for QC<sub>high</sub>. The



378 inter-assay CV was 2.77% ( $246.06 \pm 6.81$  ng/ml,  $n = 2$ ) for QC<sub>low</sub> and 3.89% ( $1323.96 \pm$   
379  $51.43$  ng/ml,  $n = 2$ ) for QC<sub>high</sub>.

380

### 381 **3.3.2. SAA and SCC**

382 The average SCC per group was: CTRL =  $48.29 \pm 28.33$  (x1000 cells/ml); SCM =  $351.12 \pm$   
383  $176.73$  (x1000 cells/ml). A trend was evident for a higher concentration of salivary SAA in  
384 the SCM cows (CTRL =  $343.42 \pm 269.60$  ng/ml, SCM =  $519.59 \pm 315.43$  ng/ml;  $t_{1,12} = 1.93$ ,  
385  $p = 0.076$ ), and a weak positive logarithmic relationship was evident between SCC and SAA  
386 ( $F_{(1,26)} = 6.26$ ,  $p = 0.019$ ;  $R^2 = 0.194$ ;  $y = 113.99\ln(x) - 81.384$ , Figure 3).

387

388 INSERT FIGURE 3 NEAR HERE

389

### 390 **3.3.3. SAA, SCC and behavior**

391 Of the 34 behavioral measures to have had correlation analyses calculated against SAA and  
392 SCC, 24 were significant; most relationships identified were weak (Table 7). No correlation  
393 (SAA or SCC) was evident for: ‘HOF’, ‘BPG’, ‘CG’, ‘HBR’, ‘HPG’, ‘%BPR+D’, ‘AlloR’,  
394 ‘%FB\_2NN’, ‘Brush’ or ‘Comfort’. A weak positive correlation between SAA and ‘Lie’, and  
395 moderate negative correlations between SAA and both ‘Feed’ and ‘Drink’, indicate that as  
396 systemic inflammation rose consumption dropped and lying increased. Positive correlations  
397 between SAA and both ‘ExpEnv’ and ‘ExpSoc’, suggest that cows with higher inflammation  
398 levels were more explorative. However, a negative correlation between SCC and ‘ExpSoc’  
399 was also observed. Quadratic relationships were evident between SCC and both ‘Trans’ and  
400 ‘Dist’; these described an initial drop in activity, as SCC increased to approximately 300  
401 (x1000 cells/ml), followed by an increase as SCC continued to rise (Figure 4). Positive  
402 correlations between SAA and ‘SocR’, ‘FocSocR’, ‘CR’, and ‘HPR’, indicate that cows with  
403 higher levels of systemic inflammation were receiving more socially agonistic behaviors.

404

405 INSERT FIGURE 4 NEAR HERE

406

407 Negative correlations between SCC and both ‘BPR’ and ‘HPR’ imply that certain agonistic  
408 behaviors were primarily directed at cows without intra-mammary inflammation. Negative  
409 correlations between SAA and ‘SocG’, ‘FocSocG’ and ‘HSG’ indicate that the performance  
410 of social behavior decreased with systemic inflammation. Increasing SCC levels were also  
411 associated with the performance of fewer head butts and the receipt of more head swipes.

412

413 **Table 7:** Significant correlations between behavioral measures (24h) and two markers of  
 414 inflammation and infection, one from saliva (SAA) and one from milk (SCC): curve estimation  
 415 regression statistics (ANOVA, coefficient of determination) and the equation for the relationship  
 416 (based upon the line of best fit).

| Behavior                | Correlation with Inflammatory Marker                                                                                                                                    |
|-------------------------|-------------------------------------------------------------------------------------------------------------------------------------------------------------------------|
| Feed, s                 | SAA: $F_{(1,28)} = 16.05$ , $p < 0.001$ ; $R^2 = 0.364$ ; $y = 1048.6e^{-7E-04x}$                                                                                       |
| Drink, s                | SAA: $F_{(1,26)} = 21.83$ , $p < 0.001$ ; $R^2 = 0.456$ ; $y = -7.077\ln(x) + 71.135$                                                                                   |
| Lie, s                  | SAA: $F_{(1,28)} = 9.69$ , $p = 0.004$ ; $R^2 = 0.257$ ; $y = 0.563x + 1830$                                                                                            |
| Trans, n                | SCC: $F_{(2,29)} = 6.21$ , $p = 0.006$ ; $R^2 = 0.300$ ; $y = 0.0002x^2 - 0.101x + 59.461$                                                                              |
| Dist, units             | SCC: $F_{(2,30)} = 4.11$ , $p = 0.026$ ; $R^2 = 0.215$ ; $y = 4E-05x^2 - 0.021x + 9.146$                                                                                |
| ExpEnv, s               | SAA: $F_{(1,28)} = 5.78$ , $p = 0.023$ ; $R^2 = 0.171$ ; $y = 8.690\ln(x) + 7.484$                                                                                      |
| ExpSoc, s               | SAA: $F_{(1,28)} = 5.57$ , $p = 0.025$ ; $R^2 = 0.166$ ; $y = 0.021x + 6.815$<br>SCC: $F_{(1,29)} = 10.17$ , $p = 0.003$ ; $R^2 = 0.260$ ; $y = 16.99e^{-0.003x}$       |
| BPR, n                  | SCC: $F_{(1,30)} = 4.03$ , $p = 0.054$ ; $R^2 = 0.119$ ; $y = 0.8818e^{-0.001x}$                                                                                        |
| CR, n                   | SAA: $F_{(1,29)} = 3.93$ , $p = 0.057$ ; $R^2 = 0.119$ ; $y = 0.0003x + 0.165$                                                                                          |
| HBG, n                  | SCC: $F_{(1,30)} = 5.50$ , $p = 0.026$ ; $R^2 = 0.155$ ; $y = 0.8708e^{-0.002x}$                                                                                        |
| HPR, n                  | SAA: $F_{(1,27)} = 4.86$ , $p = 0.036$ ; $R^2 = 0.153$ ; $y = 0.0002x + 0.062$<br>SCC: $F_{(1,31)} = 5.87$ , $p = 0.021$ ; $R^2 = 0.159$ ; $y = -1.990x + 5.520$        |
| HSG, n                  | SAA: $F_{(1,27)} = 3.79$ , $p = 0.062$ ; $R^2 = 0.123$ ; $y = 2.2425e^{-8E-04x}$                                                                                        |
| HSR, n                  | SAA: $F_{(1,28)} = 3.48$ , $p = 0.072$ ; $R^2 = 0.111$ ; $y = -0.389\ln(x) + 3.858$<br>SCC: $F_{(1,30)} = 7.74$ , $p = 0.023$ ; $R^2 = 0.161$ ; $y = 0.0002x + 1.18$    |
| FocSocR, n              | SAA: $F_{(1,26)} = 3.68$ , $p = 0.066$ ; $R^2 = 0.124$ ; $y = 0.588\ln(x) - 0.140$                                                                                      |
| FocSocG, n              | SAA: $F_{(1,27)} = 3.27$ , $p = 0.068$ ; $R^2 = 0.118$ ; $y = 4.097e^{-6E-04x}$                                                                                         |
| %CR+D, %                | SAA: $F_{(1,29)} = 3.62$ , $p = 0.068$ ; $R^2 = 0.122$ ; $y = 91.165e^{-4E-04x}$                                                                                        |
| %HBR+D, %               | SAA: $F_{(1,29)} = 5.64$ , $p = 0.024$ ; $R^2 = 0.163$ ; $y = 72.616e^{-3E-04x}$<br>SCC: $F_{(1,31)} = 8.81$ , $p = 0.006$ ; $R^2 = 0.221$ ; $y = -7.36\ln(x) + 95.594$ |
| %HPR+D <sup>1</sup> , % | SAA: $F_{(1,22)} = 3.68$ , $p = 0.068$ ; $R^2 = 0.143$ ; $y = 0.002x + 0.422$                                                                                           |
| %HSR+D, %               | SAA: $F_{(1,29)} = 3.29$ , $p = 0.080$ ; $R^2 = 0.102$ ; $y = -0.015x + 34.655$                                                                                         |
| %FocSocR+D, %           | SAA: $F_{(1,27)} = 4.93$ , $p = 0.035$ ; $R^2 = 0.154$ ; $y = -0.016x + 50.817$<br>SCC: $F_{(1,30)} = 8.54$ , $p = 0.007$ ; $R^2 = 0.222$ ; $y = -4.907\ln(x) + 67.391$ |
| AlloG, s                | SCC: $F_{(1,29)} = 3.50$ , $p = 0.072$ ; $R^2 = 0.108$ ; $y = -0.023x + 17.91$                                                                                          |
| SocG, n                 | SAA: $F_{(1,28)} = 6.13$ , $p = 0.020$ ; $R^2 = 0.180$ ; $y = 6.0245e^{-7E-04x}$                                                                                        |
| SocR, n                 | SAA: $F_{(1,26)} = 5.75$ , $p = 0.024$ ; $R^2 = 0.187$ ; $y = 0.003x + 3.222$                                                                                           |
| %FB_Open, %             | SAA: $F_{(1,28)} = 4.08$ , $p = 0.053$ ; $R^2 = 0.127$ ; $y = 3.244\ln(x) + 67.752$<br>SCC: $F_{(1,31)} = 7.71$ , $p = 0.009$ ; $R^2 = 0.199$ ; $y = 0.024x + 80.896$   |

417 <sup>1</sup>Log<sub>10</sub> transformation prior to regression analysis

418

419 Negative correlations were observed between SAA and ‘%FocSocR+D’, ‘%CR+D’,  
420 ‘%HBR+D’ and ‘%HSR+D’, and between SCC and both ‘%FocSocR+D’ and ‘%HBR+D’.  
421 This indicates that cows with greater inflammation were less likely to move away (i.e. be  
422 displaced) after receiving agonistic behavior, suggesting lower social reactivity. However, a  
423 positive correlation between SAA and ‘%HPR+D’ suggests that, following receipt of a head  
424 push, cows with greater systemic inflammation were displaced more frequently. A negative  
425 correlation between SCC and ‘AlloG’ indicates that the performance of allogrooming  
426 decreased with increased mammary inflammation. Finally, positive correlations between both  
427 inflammatory markers and ‘%FB\_Open’ reveal that the self-locking feed barriers were used  
428 less as inflammation increased.

429

#### 430 **4. DISCUSSION**

431 The main purpose of this study was to identify salivary SAA, social and other behavioral  
432 changes associated with subclinical inflammation (mastitis) in cows. Salivary SAA was  
433 shown to have potential as a marker of low-level systemic inflammation because levels were  
434 found to be higher in cows with subclinical mastitis, and higher levels were associated with  
435 several key sickness behaviors. Furthermore, SCM cows displayed lower ‘activity’,  
436 ‘sociality’ (including the performance and receipt of multiple social behaviors) and ‘social  
437 reactivity’, and demonstrated a shift in activity peaks for several behaviors to quieter times of  
438 the day.

439

##### 440 **4.1. Salivary SAA**

441 Positive correlations between SCC and non-salivary SAA have often been reported from  
442 cows with clinical and sub-clinical mastitis (serum: des Roches et al., 2017; milk: O’Mahony  
443 et al., 2006; Akerstedt et al., 2007; Pyörälä et al., 2011) and we report here, for the first time,  
444 the same for salivary SAA. SAA in saliva thus appears to offer potential as a non-invasive  
445 means of detecting subclinical infection. During field conditions, several bacterial strains can  
446 cause mastitis of varying duration and degree (Verbeke et al., 2014), and it is likely that the  
447 concentration of SAA in saliva will vary accordingly. Pyörälä et al. (2011) detected  
448 significant differences in SAA (milk) collected from cows with spontaneous mastitis caused  
449 by different pathogens; low SAA was associated with *A. pyogenes*, while high concentrations  
450 were associated with *E. coli*.

451

##### 452 **4.2. Social Behavior**

453 Although no differences in cumulative social behavior given or received were evident  
454 between the two groups overall (24h), the CTRL cows received significantly more social  
455 behavior than the SCM cows following morning milking (1hPostM1); this provides evidence  
456 for diurnal differences in behavior. By dividing social behavior into the broad categories of  
457 socio-negative (i.e. agonistic competitive) and socio-positive (affiliative) we were able to  
458 identify specific disparities.

459

#### 460 **4.2.1. Agonistic competitive behavior**

461 Sick cows are often reported to perform fewer agonistic interactions and competitive  
462 displacements from the feed-bunk (bacterial lameness: Galindo and Broom, 2000; 2002; sub-  
463 clinical metritis: Huzzey et al., 2007; Patbandba et al., 2012; clinical and sub-clinical  
464 mastitis: Sepúlveda-Varas et al., 2014; 2016), and from cubicles (Jensen and Proudfoot,  
465 2017), than healthy individuals. In addition, sick cows often receive more agonism, and are  
466 displaced more frequently, than healthy cows (bacterial lameness: Galindo and Broom, 2002;  
467 metritis: Patbandba et al., 2012; Neave et al., 2018; Lomb et al., 2018; metritis and sub-  
468 clinical ketosis: Schirrmann et al., 2016). On this basis we predicted our SCM cows to also  
469 perform less and receive more agonistic behavior than the CTRL cows. Counter to these  
470 expectations the CTRL group received more challenges (24h), and more head butts, body  
471 pushes and total aggression (1hPostM1), than the SCM group, supported by negative  
472 correlations between SCC and the receipt of both head and body pushes. Presumably, the  
473 healthy animals partook in more physical contact and jostling as part of actively re-  
474 establishing dominance, since aggressive competitive interactions are key to establishing and  
475 maintaining social order within dynamic groups (Val-Laillet et al., 2008).

476

477 The receipt of head swipes was the one agonistic measure that was significantly higher in our  
478 SCM group (24h). Since this is a common social behavior, occurring almost exclusively at  
479 the feed barrier as part of feed competition (i.e. a means of displacing immediate neighbours),  
480 this finding does correspond with predictions of 'sickness' and the wider literature.

481 Interestingly, we also observed positive correlations between SAA and several measures of  
482 social and agonistic receipt ('SocR', 'FocSocR', 'CR', 'HPR'), indicating that cows with  
483 higher levels of systemic inflammation also were more frequently the recipients of agonistic  
484 behavior. We cannot discount the possibility that SAA upregulation occurred within our  
485 CTRL group due to early undiagnosed non-mastitic infection or following exposure to social  
486 stress. Upregulation of C-Reactive Protein (an APP known to increase during illness and

487 stress) has been reported in zoo-housed gorillas following an aggressive encounter (Fuller  
488 and Allard, 2018). In the current study saliva samples were collected the day after behavioral  
489 observations were made, therefore an elevation in SAA may also occur as a consequence of  
490 agonistic encounters experienced during the previous day.

491

492 In line with the hypothesis that social behavior should decrease with inflammation/sickness,  
493 and our observation that CTRL cows performed more agonistic behavior, SAA was  
494 negatively correlated with ‘SocG’, ‘FocSocG’ and ‘HSG’, and SCC was negatively  
495 correlated to ‘HBG’. Although social rankings were not calculated in the current study it is  
496 possible that the social rank of an individual could be influenced by the effects of disease due  
497 to a loss of competitive vigour. Dominant animals frequently displace subordinate cows from  
498 the feed barrier (DeVries et al., 2004; Huzzey et al., 2006), and subordinate animals adjust  
499 their eating patterns accordingly (DeVries et al., 2004). In our study CTRL cows performed  
500 more agonistic behavior immediately before the first milking (05:00h) and mid-afternoon  
501 (16:00h), while SCM cows performed more prior to the second milking (13:00h). Focusing  
502 activities outside of peak times may be a means of avoiding agonistic interactions with  
503 socially dominant individuals but, due to high stocking densities, there will always be an  
504 immediate social environment to manage. It is conceivable, but beyond the reach of our data,  
505 that agonistic behavior performed by the SCM cows was aimed at other sick or low-ranking  
506 individuals employing similar competitive tactics.

507

#### 508 **4.2.2. Social reactivity**

509 Llonch et al. (2018) identified a group of cows that were more reactive to the presence of  
510 conspecifics at the feed barrier; frequent feeding interruptions lead to shorter, but more  
511 frequent, visits to the feeder. Since subordinate or sick cows are more likely to engage in  
512 avoidance behavior in response to social confrontation (Huzzey et al., 2006; Goldhawk et al.,  
513 2009; Proudfoot et al., 2009) we may anticipate such individuals to also display greater  
514 reactivity (i.e. be more likely to move away when challenged at the feeder). However, in the  
515 current study the opposite was true; CTRL cows were more likely to be displaced than SCM  
516 cows following the receipt of agonistic behavior. Not only were CTRL cows more reactive  
517 than SCM cows, but reactivity appeared to decrease with increasing inflammation (negative  
518 correlations were observed between SAA and ‘%FocSocR+D’, ‘%CR+D’, ‘%HBR+D’ and  
519 ‘%HSR+D’, and between SCC and both ‘%FocSocR+D’ and ‘%HBR+D’). This observation  
520 could be explained by social environment. Choice of feeding position has been shown to be

521 affected by dominance relationships; dissimilar neighbours (low/high rank) are known to  
522 maintain a greater distance of separation than individuals of similar rank (Manson and  
523 Appleby, 1990). If the CTRL cows were less discriminatory, regarding their social  
524 environment, then they may have been more likely to receive aggressive encounters from  
525 dominant individuals and reacted accordingly. Conversely, if the SCM cows proactively  
526 avoided dominants, and preferentially selected the company of other sick or lower ranking  
527 cows, then moderate competitive aggression received from an individual of similar standing  
528 may have been tolerable (i.e. not elicited displacement).

529

#### 530 **4.2.3. Affiliative behavior**

531 Very little research has been conducted on allogrooming and illness in cows. Galindo and  
532 Broom (2002) observed lame cows to be allogroomed more than non-lame cows, and this  
533 was interpreted as a self-instigated coping strategy triggered by pain/discomfort. Cows appear  
534 to find comfort in being licked; individuals who solicit more licking are licked more  
535 frequently (Benham, 1984). We predicted that allogrooming would be lower in the SCM  
536 group since subordinate individuals are licked, and lick, less frequently than high ranking  
537 individuals (Napolitano et al., 2007), allogrooming decreases more in low-ranking  
538 individuals under conditions of increased competition (Val-Laillet et al., 2008), and mild  
539 ‘sickness’ is likely to reduce motivation for luxury behavior. As hypothesised, CTRL cows  
540 performed more allogrooming than SCM cows overall (24h), confirmed by a negative  
541 correlation between SCC and ‘AlloG’; in addition, they were also allogroomed more than  
542 SCM cows in the hour following morning milking. Since social grooming serves a variety of  
543 functions in cattle, including roles in hygiene, the provision of pleasure, the maintenance of  
544 social bonds and in lowering social tension (Sato et al., 1991; 1993), it is possible that  
545 prolonged suppression of this behavior could have negative implications for welfare and  
546 fitness.

547

#### 548 **4.2.4. Social avoidance**

549 Sickness-driven social avoidance is well documented in lab-animals and humans, and can be  
550 predicted by the action of pro-inflammatory cytokines on the CNS (Kent et al., 1992; Bluthe  
551 et al., 1996; Dantzer and Kelley, 2007; Arakawa et al., 2010). Due to the limited opportunity  
552 for social avoidance within intensive systems this behavior has been relatively understudied  
553 in sick farm animals. In the current study CTRL cows performed more social exploration  
554 than the SCM cows (and a negative correlation was evident between SCC and ‘ExpSoc’),



555 potentially due to the SCM cows actively avoiding social interaction. The unexpected weak  
556 positive correlation between SAA and ‘ExpSoc’ may be, at least partially, explained by the  
557 presence of both pre-clinical and post-clinical cows within our focal group; i.e. early-stage  
558 mastitic cows (low SAA), demonstrating sickness-driven reductions in ‘ExpSoc’, in  
559 combination with individuals in remission (high SAA), demonstrating normal baseline  
560 ‘ExpSoc’ (see Section 4.4.4).

561

562 The prevalence of agonistic behavior at the feed barrier is known to be influenced by barrier  
563 design; self-locking yokes have vertical bars which separate the necks of adjacent cows, and  
564 these are better at reducing competitive interactions (displacements) compared to open post-  
565 and-rail barriers (Endres et al., 2005; Huzzey et al., 2006). In the current study SCM cows  
566 spent a significantly greater proportion of their time feeding at the open section of the barrier  
567 than did the CTRL cows, and a positive correlation between SAA and ‘%FB\_Open’ indicates  
568 this preference to increase with rising systemic inflammation. Although this appears to be  
569 counter-intuitive, other factors are likely to contribute to the choice of feeding location; e.g.,  
570 in the open section cows have better visibility and are more quickly able to withdraw from  
571 potential agonistic interactions.

572

### 573 **4.3. Activity**

574 The observation that our SCM cows made fewer behavioral transitions and moved over a  
575 shorter distance than CTRL cows is in agreement with other studies that describe reduced  
576 activity prior to the clinical diagnosis of mastitis (Fogsgaard et al., 2012; Kester et al., 2015;  
577 Stangaferro et al., 2016; Veissier et al., 2017; King et al., 2018). The quadratic relationships  
578 between SCC and both ‘Trans’ and ‘Dist’ described in the current study are of interest  
579 because mastitic cows have also been reported to display increased activity (Siivonen et al.,  
580 2011; Medrano-Galarza et al., 2012), presumably due to udder discomfort and an associated  
581 reduction in lying time. Jadhav et al. (2018) argue that the threshold SCC value to delineate  
582 subclinical mastitis from normal should be 310, rather than 200 (x1000 cells/ml), as  
583 conventionally judged (e.g. Madouasse et al., 2010). This higher value closely corresponds  
584 with the parabola vertex in both quadratic plots (Figure 4), of approx. 300 (x1000 cells/ml);  
585 i.e. the point at which activity once again begins to rise.

586

587 The circadian rhythm of cow activity is known to become disrupted during disease (Veissier  
588 et al., 1989; 2017; Kauppi, 2014). Veissier et al. (2017) observed that diseased cows may not



589 consistently decrease their activity, but instead focus their activities within specific time  
590 periods; mastitic cows were observed to be hyperactive throughout the day, whereas lame  
591 cows were hyperactive at night. We identified two periods during which our SCM cows were  
592 more active than the CTRL animals (00:00 to 01:00h and 13:00 to 14:00h); presumably these  
593 represented quieter periods, when a proportion of the herd, including socially dominant  
594 individuals, were resting.

595

#### 596 **4.4. Core and Non-Social Behavior**

##### 597 **4.4.1. Ingestion**

598 Changes in feeding behavior have long been used to diagnose the onset of illness (Weary et  
599 al., 2009). Although we observed a negative correlation between SAA and feeding duration,  
600 as would be hypothesised to occur with sickness, the average inflammatory response within  
601 our SCM group overall was not sufficiently pronounced to trigger obvious anorexia, as  
602 compared to healthy controls. Gonzalez et al. (2008) report variability in feeding behavior  
603 relating to naturally occurring udder disorders; some cows demonstrated a decrease in  
604 feeding duration with the onset of mastitis, while others showed no change. It is possible that  
605 aspects of feeding behavior, other than duration, may have been altered. Barn-housed cattle  
606 demonstrate highly synchronised feeding activity, with large peaks in both feeding and social  
607 competition coinciding with fresh food delivery, and smaller peaks following milking  
608 (DeVries and von Keyserlingk, 2005; Dollinger and Kaufmann, 2013). Mastitic cows,  
609 presumably to avoid adverse social interactions, have been shown to feed at less popular  
610 times such as early afternoon (Schirmann et al., 2016). Our study identified such a period,  
611 between 13:00 and 14:00h (immediately prior to second milking) as one in which the SCM  
612 cows fed for longer than the CTRL cows. Sepúlveda-Varas et al. (2016) observed a decrease  
613 in feed intake (but not duration) prior to the diagnosis of clinical mastitis which may be  
614 attributed to underlying malaise.

615

616 Water and feed intake are positively related in cattle (Kume et al., 2010); however, drinking  
617 tends to be less affected by health than feeding (Hart, 1988). Water is more immediately vital  
618 for maintaining bodily functions (Kyriazakis and Tolcamp, 2011), and since drinking takes  
619 less time than food consumption it is less at risk from social competition at the trough  
620 (Huzzey et al., 2007). Although a reduction in water consumption has been reported in cows  
621 with mastitis (Lukas et al., 2008; Siivonen et al., 2011), and we observed a negative  
622 correlation between SAA and drinking duration, the level of systemic inflammation within

623 our SCM group may have been too low, and/or our sample size too small, to induce a group  
624 difference.

625

#### 626 **4.4.2. Lying**

627 Lying is a highly prioritised behavior in cattle due to its importance in rumination (Jensen et  
628 al., 2004; 2005; Munksgaard et al., 2005); dairy cows spend approximately 11h/day  
629 recumbent (Ito et al., 2009; 2010). Increased lying duration, as a means of conserving energy  
630 and facilitating recovery, is a key adaption for sickness, and a positive correlation between  
631 SAA and ‘Lie’ was evident within our test population. Although extended lying duration has  
632 been frequently reported during cattle illness (e.g. BRD: Toaff Rosenstein et al., 2016;  
633 moderate lameness: Weigele et al., 2017; metritis: Huzzey et al., 2007; Sepúlveda-Varas et  
634 al., 2014; Barragan et al., 2018), lying may decrease during mastitis (Yeiser et al., 2012;  
635 Medrano-Galarza et al. 2012; Fogsgaard et al., 2012; 2015), presumably due to udder pain  
636 (Cyples et al., 2012). Although we observed no difference in ‘Lie’ between our two groups,  
637 the SCM cows were observed to lie with their heads held against their flank more than the  
638 CTRL cows. This posture is primarily associated with rapid eye movement (REM) sleep;  
639 however, cows are also known to display non-rapid eye movement (NREM) sleep and  
640 drowsing in this position (Ternman et al., 2013), and NREM (deep) sleep often increases  
641 during infection (Bryant et al., 2004; Opp, 2005).

642

#### 643 **4.4.3. Self-grooming**

644 Although grooming is a comfort activity that cows are highly motivated to perform  
645 (McConnachie et al., 2018), brush use is a luxury activity, characterised by low behavioral  
646 resilience (Dawkins, 1990), and has been shown to decrease during disease (sub-clinical  
647 metritis: Mandel et al., 2017; lameness: Weigele et al., 2017; BRD: Toaff Rosenstein et al.,  
648 2016). A trade-off between brush location and the sensitivity of brush use for detecting stress  
649 and morbidity (Mandel et al., 2013; 2017) may help to explain why we failed to observe a  
650 significant difference between our two groups, or indeed a correlation between SAA and  
651 ‘Brush’. The brush in the current study was readily accessible to all cows in the group with  
652 minimal effort, being located central to many resources including the feed barrier, a water  
653 trough and cubicles. Much variation exists in the reporting of self-grooming (licking)  
654 following illness and/or immune challenge in cows; studies report a decrease (LPS: Borderas  
655 et al., 2008; mastitis: Fogsgaard et al., 2012; BRD: Toaff-Rosenstein and Tucker, 2018), an  
656 increase (lameness: Almeida et al., 2008), and no difference (mastitis: Siivonen et al., 2011).

657 In the current study SCM cows performed more comfort behavior (including self-licking)  
658 than CTRL cows immediately following morning milking. This may be a response to mild  
659 udder discomfort or as a substitute for allogrooming (see section 4.2.3).

660

#### 661 **4.4.4. Environmental exploration**

662 Des Roches et al. (2017; 2018) report behavioral changes (including reduced attentiveness)  
663 during the pre-clinical phase of an experimental mastitis model (prior to the upregulation of  
664 SCC and serum SAA), and during the acute phase (coinciding with raised levels of SCC and  
665 SAA), but not during the remission phase, even although high levels of SCC/SAA were still  
666 evident. This suggests that a peak in serum SAA corresponds with the remission, rather than  
667 the acute, phase of inflammation. The weak positive correlation between SAA and  
668 environmental exploration ('ExpEnv') described in the current study was unexpected since  
669 exploratory behavior would be predicted to decline with sickness/inflammation. If our test  
670 cohort contained a proportion of individuals in the pre-clinical phase (low salivary SAA but  
671 demonstrating sickness-lowered social exploration) and a proportion of individuals in the  
672 remission phase (high SAA with healthy baseline levels of social exploration) then this may  
673 offer an explanation. One of the behaviors included within the 'ExpEnv' measure was  
674 'explore sand'. Cows can spend a long-time sniffing sand prior to selection of a cubicle to lie  
675 down in. Although our SCM cows did take longer to lie down than the CTRL cows this  
676 difference failed to reach significance (data not shown). Ruminants generally display low  
677 baseline levels of exploratory behavior when maintained in intensive housing, since it is a  
678 largely unstimulating environment (De Rosa et al., 2009). Although a reduction in 'ExpEnv'  
679 was not evident in our SCM group overall (24h), the CTRL cows did display more interest in  
680 their surroundings than SCM cows during the hour following the morning milking, which  
681 coincided with the provision of the single daily meal. CTRL cows also displayed more  
682 exploratory behavior between 05:00 – 06:00h (the hour prior to morning milking/feed  
683 delivery), presumably in anticipation of what was to come. SCM cows, conversely,  
684 dominated exploratory behavior at quieter times of the day (00:00 – 01:00h and 13:00 –  
685 14:00h), providing further evidence for a diurnal shift in activity.

686

#### 687 **4.5 Future Research**

688 Using effect size statistics on the 24h data set, we classified the between-group differences in  
689 several measures as being biologically 'inconclusive'; i.e., effect size differences between the  
690 treatment groups remain plausible but were not conclusive given our sample size, and these,

691 therefore, provide a promising focus for future research into behavioral correlates of  
692 subclinical disease states in cows. They included brush use, body push given, challenge  
693 given, head swipe given, head butt received and mutual head butt. On the basis of several  
694 unexpected correlations within the current study (significant, but occurring in the opposite  
695 direction than predicted), and that disease models have demonstrated that peak immunity  
696 (APP levels) occurs during remission and persist after the recovery of sickness behavior (des  
697 Roches et al., 2017, 2018), we recommend further studies to investigate the association  
698 between inflammatory markers and behavior over natural disease progression. In humans,  
699 sickness is characteristically accompanied by a feeling of ‘malaise’, an affective state that  
700 involves the negative subjective experience of depression, lethargy and anhedonia, and is  
701 induced by pro-inflammatory cytokines as part of the body’s sickness response (Dantzer et  
702 al., 2004). Whether subclinically-mastitic cows similarly experience malaise or a ‘malaise-  
703 like’ affective state is not known (see Weary et al., 2009). However, it does seem possible  
704 based on the evidence of pro-inflammatory cytokine-induced anhedonia and depression-like  
705 states in rats (Dantzer et al., 2008), and therefore also merits further investigation.

706

## 707 **5. CONCLUSIONS**

708 By studying the behavior of a group of matched-pair cows over short distinct time periods  
709 (1h and 24h) we identified that sub-clinical mastitis (SCM) was associated with a reduction in  
710 activity, social exploration, the receipt of affiliative behavior, social reactivity (following the  
711 receipt of agonistic behavior), and an increase in the receipt of head swipes, compared to  
712 clinically healthy control (CTRL) cows. Several of these measures are low-resilience  
713 behaviors, which have previously been highlighted as having potential for early illness  
714 detection since they are expected to decrease earlier than core activities (Weary et al., 2009).  
715 Although no difference in any core maintenance behavior (feeding, drinking, lying duration)  
716 was detected, the SCM cows did demonstrate a preference for risk-adverse ‘within-herd  
717 feeding’, spending a greater proportion of time feeding in direct contact with two neighbours,  
718 and spending a lower proportion of their time feeding at the self-locking feed barriers than  
719 the CTRL cows. We present evidence for diurnal differences in the daily behavioral routine  
720 between the two groups, which indicates that SCM cows shift their activity to quieter times of  
721 the day. It seems likely that this is a tactic employed by the SCM cows to actively avoid  
722 agonistic encounters since the CTRL cows were more likely to perform and receive agonistic  
723 behavior. A positive relationship between SCC and SAA was observed, indicating salivary  
724 SAA (a marker of systemic inflammation) to be a potential physiological marker of

725 subclinical mastitis. The majority of our behavioral measures was also found to correlate with  
726 salivary SAA in a direction consistent with sickness behavior. Taken together, these findings  
727 demonstrate that physiological and behavioral changes associated with subclinical mastitis in  
728 cows are consistent with predictions for low-level sickness responses.

729

### 730 **ACKNOWLEDGEMENTS**

731 This study was funded by The John Oldacre Foundation. We would also like to thank the  
732 staff at Wyndhurst Farm for facilitating our research.

733

### 734 **COMPETING INTERESTS STATEMENT**

735 The authors have no competing interests to declare.

736

### 737 **REFERENCES**

738

739 AHDB, 2015. The Agriculture and horticulture development board dairy mobility scoresheet  
740 [https://projectblue.blob.core.windows.net/media/Default/Dairy/Publications/Dairy%20Mobility%20Scoresheet\\_200427\\_WEB.pdf](https://projectblue.blob.core.windows.net/media/Default/Dairy/Publications/Dairy%20Mobility%20Scoresheet_200427_WEB.pdf) - accessed 14/07/20

741

742  
743 Åkerstedt, M., K. P. Waller, and A. Sternesjö, 2007. Haptoglobin and serum amyloid A in  
744 relation to the somatic cell count in quarter, cow composite and bulk tank milk samples. *J.*  
745 *Dairy Res.* 74:198-203. <https://doi.org/10.1017/S0022029906002305>

746

747 Almeida, P. E., P. S. D. Weber, J. L. Burton, and A. J. Zanella, 2008. Depressed DHEA and  
748 increased sickness response behaviors in lame dairy cows with inflammatory foot lesions.  
749 *Domestic Anim. Endocrinol.* 34(1):89-99. <https://doi.org/10.1016/j.domaniend.2006.11.006>

750

751 Andrew, W., J. Gao, S. M. Mullan, N. W. Campbell, A. Dowsey, and T. Burghardt, 2020.  
752 Visual identification of individual holstein friesian cattle via deep metric learning. *Comput.*  
753 *Electron. Agric.* <https://arxiv.org/abs/2006.09205>

754

755 Arakawa, H., K. Arakawa, and T. Deak, 2010. Sickness-related odor communication signals  
756 as determinants of social behavior in rat: a role for inflammatory processes. *Horm. Behav.*  
757 *57:30-341.* <https://doi.org/10.1016/j.yhbeh.2010.01.002>

758

759 Barragan A. A., J. M. Piñeiro, G. M. Schuenemann, P. J. Rajala-Schultz, D. E. Sanders, J.  
760 Lakritz, and S. Bas, 2018. Assessment of daily activity patterns and biomarkers of pain,  
761 inflammation, and stress in lactating dairy cows diagnosed with clinical metritis. *J. Dairy Sci.*  
762 *101(9):8248-8258.* <https://doi.org/10.3168/jds.2018-14510>

763

764 Benham, P. F. J., 1984. Social organisation in groups of cattle and the interrelationship  
765 between social and grazing behaviours under different grazing management systems.  
766 Doctoral dissertation, University of Reading, England.

767

- 768 Bluthé, R. M., B. Michaud, K. W. Kelley, and R. Dantzer, 1996. Vagotomy attenuates  
769 behavioural effects of interleukin-1 injected peripherally but not centrally. *Neuroreport*  
770 7(9):1485-1488. <https://doi.org/10.1097/00001756-199606170-00008>  
771
- 772 Borderas, T. F., A. M. Passillé, and J. Rushen, 2008. Behavior of dairy calves after a low  
773 dose of bacterial endotoxin. *J. Anim. Sci.* 86:2920–2927. [https://doi.org/10.2527/jas.2008-](https://doi.org/10.2527/jas.2008-0926)  
774 0926  
775
- 776 Bryant, P. A., J. Trinder, and N. Curtis, 2004. Sick and tired: Does sleep have a vital role in  
777 the immune system? *Nature Rev. Immunol.* 4:457-467. <https://doi.org/10.1038/nri1369>  
778
- 779 Cerón, J. J., 2019. Acute phase proteins, saliva and education in laboratory science: an update  
780 and some reflections. *BMC Vet. Res.* 15:197. <https://doi.org/10.1186/s12917-019-1931-8>  
781
- 782 Cohen, J., 1988. Chapter 6: Differences between proportions. Pages 184-185 in *Statistical*  
783 *Power Analysis for the Behavioral Sciences*, 2nd edition. Hillsdale, Lawrence Erlbaum  
784 Publishers.  
785
- 786 Cyples, J. A., C. E. Fitzpatrick, K. E. Leslie, T. J. DeVries, D. B. Haley, and N. Chapinal,  
787 2012. Short communication: The effects of experimentally induced *Escherichia coli* clinical  
788 mastitis on lying behavior of dairy cows. *J. Dairy Sci.* 95(5):2571-2575.  
789 <https://doi.org/10.3168/jds.2011-5135>.  
790
- 791 Dantzer, R. 2004. Cytokine-induced sickness behaviour: A neuroimmune response to  
792 activation of innate immunity. *Eur. J. Pharmacol.* 500:399–411.  
793 <https://doi.org/10.1016/j.ejphar.2004.07.040>  
794
- 795 Dantzer, R. and K. W. Kelley, 2007. Twenty years of research on cytokine-induced sickness  
796 behaviour. *Brain Behav. Immun.* 21(2):153-160. <https://doi.org/10.1016/j.bbi.2006.09.006>  
797
- 798 Dantzer, R., J. C. O'Connor, G. G. Freund, R. W. Johnson, and K. W. Kelley, 2008. From  
799 inflammation to sickness and depression: When the immune system subjugates the brain.  
800 *Nature Rev. Neurosci.* 9(1):46-56. <https://doi.org/10.1016/j.bbi.2006.09.006>  
801
- 802 Dawkins, M. S. 1990. From an animal's point of view: Motivation, fitness, and animal  
803 welfare. *Behav. Brain Sci.* 13:1–9. <https://doi.org/10.1017/S0140525X00077104>  
804
- 805 De Rosa, G., F. Grasso, A. Braghieri, A. Bilancione, A. Di Francia, and F. Napolitano, 2009.  
806 Behavior and milk production of buffalo cows as affected by housing system. *J. Dairy Sci.*  
807 92(3):907-912. <https://doi.org/10.3168/jds.2008-1157>  
808
- 809 des Roches, A. D. B., M. Faure, A. Lussert, V. Herry, P. Rainard, D. Durand, and G. Foucras,  
810 2017. Behavioral and patho-physiological response as possible signs of pain in dairy cows  
811 during *Escherichia coli* mastitis: A pilot study. *J. Dairy Sci.* 100:8385–8397.  
812 <https://doi.org/10.3168/jds.2017-12796>  
813
- 814 des Roches, A. D. B., A. Lussert, M. Faure, V. Herry, P. Rainard, D. Durand, F.  
815 Wemelsfelder, and G. Foucras, 2018. Dairy cows under experimentally-induced *Escherichia*  
816 *coli* mastitis show negative emotional states assessed through Qualitative Behaviour



- 817 Assessment. *Appl. Anim. Behav. Sci.* 206:1-11.  
818 <https://doi.org/10.1016/j.applanim.2018.06.004>  
819
- 820 DeVries, T. J. and M. A. G. von Keyserlingk, 2005. Time of feed delivery affects the feeding  
821 and lying patterns of dairy cows. *J. Dairy Sci.* 88: 625–631.  
822 [https://doi.org/10.3168/jds.S0022-0302\(05\)72726-0](https://doi.org/10.3168/jds.S0022-0302(05)72726-0)  
823
- 824 DeVries, T. J., M. A. G. von Keyserlingk, and D. M. Weary, 2004. Effect of feeding space on  
825 the inter-cow distance, aggression, and feeding behavior of free-stall housed lactating dairy  
826 cows. *J. Dairy Sci.* 87:1432–1438. [https://doi.org/10.3168/jds.S0022-0302\(04\)73293-2](https://doi.org/10.3168/jds.S0022-0302(04)73293-2)  
827
- 828 Dollinger, J. and O. Kaufmann, 2013. Feeding behaviour in dairy cows with and without the  
829 influence of clinical diseases or subclinical disorders. *Archiv. Tierzucht* 56(14):149-159.  
830 <https://doi.org/10.7482/0003-9438-56-014>  
831
- 832 Eckersall, P. D., F. J. Young, A. M. Nolan, C. H. Knight, C. McComb, M. M. Waterston, C.  
833 J. Hogarth, E. M. Scott, and J. L. Fitzpatrick, 2006. Acute phase proteins in bovine milk in an  
834 experimental model of *Staphylococcus aureus* subclinical mastitis. *J. Dairy Sci.* 89(5):1488-  
835 1501. [https://doi.org/10.3168/jds.S0022-0302\(06\)72216-0](https://doi.org/10.3168/jds.S0022-0302(06)72216-0)  
836
- 837 Endres, M. I., T. J. DeVries, M. A. G. von Keyserlingk, and D. M. Weary, 2005. Effect of  
838 feed barrier design on the behavior of loose housed lactating dairy cows. *J. Dairy Sci.*  
839 88:2377–2380. [https://doi.org/10.3168/jds.S0022-0302\(05\)72915-5](https://doi.org/10.3168/jds.S0022-0302(05)72915-5)  
840
- 841 Fogsgaard, K. K., C. M. Røntved, P. Sørensen, and M. S. Herskin, 2012. Sickness behavior  
842 in dairy cows during *Escherichia coli* mastitis. *J. Dairy Sci.* 95(2):630–638.  
843 <https://doi.org/10.3168/jds.2011-4350>  
844
- 845 Fogsgaard, K. K., T. W. Bendedsgaard, and M. S. Herskin, 2015. Behavioral changes in  
846 freestall-housed dairy cows with naturally occurring clinical mastitis. *J. Dairy Sci.* 98:1730–  
847 1738. <https://doi.org/10.3168/jds.2014-8347>  
848
- 849 Fuller, G. and S. Allard, 2018. Preliminary data showing potential for salivary C-reactive  
850 protein as an indicator of welfare in western lowland gorillas (*Gorilla gorilla gorilla*). *J. Vet.*  
851 *Behav.* 28:58-62. <https://doi.org/10.1016/j.jveb.2018.08.005>  
852
- 853 Galindo, F. and D. M. Broom, 2000. The relationships between social behaviour of dairy  
854 cows and the occurrence of lameness in three herds. *Res. Vet. Sci.* 69:75–79.  
855 <https://doi.org/10.1053/rvsc.2000.0391>  
856
- 857 Galindo, F. and D. M. Broom, 2002. The effects of lameness on social and individual  
858 behavior of dairy cows. *J. Appl. Anim. Welfare Sci.* 5(3):193–201.  
859 [https://doi.org/10.1207/S15327604JAWS0503\\_03](https://doi.org/10.1207/S15327604JAWS0503_03)  
860
- 861 Gerlanc, D. and K. N. Kirby, 2012. bootES (Version 1.0). Retrieved from [http://cran.r-](http://cran.r-project.org/web/packages/bootES/index.html)  
862 [project.org/web/packages/bootES/index.html](http://cran.r-project.org/web/packages/bootES/index.html)  
863
- 864 Gleerup, K. B., P. H. Andersen, L. Munksgaard, and B. Forkman, 2015. Pain evaluation in  
865 dairy cattle. *Appl. Anim. Behav. Sci.* 171:25-32.  
866 <https://doi.org/10.1016/j.applanim.2015.08.023>



- 867  
868 Goldhawk, C., N. Chapinal, D. M. Veira, D. M. Weary, and M. A. G. von Keyserlingk, 2009.  
869 Parturum feeding behavior is an early indicator of subclinical ketosis. *J. Dairy Sci.* 92:4971–  
870 4977. <https://doi.org/10.3168/jds.2009-2242>  
871  
872 González, L. A., B. J. Tolkamp, M. P. Coffey, A. Ferret, and I. Kyriazakis, 2008. Changes in  
873 feeding behavior as possible indicators for the automatic monitoring of health disorders in  
874 dairy cows. *J. Dairy Sci.* 91:1017-1028. <https://doi.org/10.3168/jds.2007-0530>  
875  
876 Gröhn, Y. T., P. J. Rajala-Schultz, H. G. Allore, M. A. DeLorenzo, J. A. Hertl, and D. T.  
877 Galligan, 2003. Optimizing replacement of dairy cows: modeling the effects of diseases.  
878 *Prev. Vet. Med.* 61: 27-43. [https://doi.org/10.1016/S0167-5877\(03\)00158-2](https://doi.org/10.1016/S0167-5877(03)00158-2)  
879  
880 Gu, J. Q., Z. H. Wang, R. H. Gao, H. R. Wu, 2017. Cow behavior recognition based on image  
881 analysis and activities. *Int. J. Agric. Biol. Eng.* 10(3):165–174. [https://doi.org/10.165-](https://doi.org/10.165-174.10.3965/j.ijabe.20171003.3080)  
882 [174.10.3965/j.ijabe.20171003.3080](https://doi.org/10.165-174.10.3965/j.ijabe.20171003.3080)  
883  
884 Guzhva, O., H. Ardö, A. Herlin, M. Nilsson, K. Åström, and C. Bergsten, 2016. Feasibility  
885 study for the implementation of an automatic system for the detection of social interactions in  
886 the waiting area of automatic milking stations by using a video surveillance system. *Comp.*  
887 *Elec. Agri.* 127:506-509. <https://doi.org/10.1016/j.compag.2016.07.010>  
888  
889 Hart, B. L., 1988. Biological basis of the behavior of sick animals. *Neurosci. Biobehav. Rev.*  
890 12:123-137. [https://doi.org/10.1016/S0149-7634\(88\)80004-6](https://doi.org/10.1016/S0149-7634(88)80004-6)  
891  
892 Hart, B. L., 2010. Beyond fever. Pages 205-210 in *Comparative Perspectives on Sickness*  
893 *Behavior*. Encyclopedia of Animal Behavior. Elsevier.  
894  
895 Hedges, L.V., 1981. Distributional theory for Glass’s estimator of effect size and related  
896 estimators. *J. Educ. Stats* 6:107–128. <https://doi.org/10.3102%2F10769986006002107>  
897  
898 Hoonhout, L., I. Reimert, and C. I. Daigle, 2017. Relationship between allogrooming and  
899 disease in feedlot steers: Social interactions may provide information about individual animal  
900 health. *J. Anim. Sci.* 95(s4):2. <https://doi.org/10.2527/asasann.2017.003>  
901  
902 Huzzey, J. M., T. J. DeVries, P. Valois, and M. A. G. von Keyserlingk, 2006. Stocking  
903 density and feed barrier design affect the feeding and social behavior of dairy cattle. *J. Dairy*  
904 *Sci.* 89:126–133. [https://doi.org/10.3168/jds.S0022-0302\(06\)72075-6](https://doi.org/10.3168/jds.S0022-0302(06)72075-6)  
905  
906 Huzzey, J. M., D. M. Veira, D. M. Weary, and M. A. G. von Keyserlingk, 2007. Parturum  
907 behavior and dry matter intake identify dairy cows at risk for metritis. *J. Dairy Sci.* 90:3220–  
908 3233. <https://doi.org/10.3168/jds.2006-807>  
909  
910 ISO 13366-1, 1997. Part 1: Microscopic method (Reference method). In: *Milk – Enumeration*  
911 *of Somatic Cells*. International Organization for Standardisation, Geneva, Switzerland.  
912 <https://webstore.ansi.org/Standards/ISO/ISO133661997>  
913  
914 Ito, K., D. M. Weary, and M. A. G. von Keyserlingk, 2009. Lying behavior: Assessing  
915 within- and between-herd variation in free-stall-housed dairy cows. *J. Dairy Sci.* 92:4412–  
916 4420. <https://doi.org/10.3168/jds.2009-2235>

- 917  
918 Ito, K., M. A. G. Von Keyserlingk, S. J. LeBlanc, and D. M. Weary, 2010. Lying behavior as  
919 an indicator of lameness in dairy cows. *J. Dairy Sci.* 93(8):3553-3560.  
920 <https://doi.org/10.3168/jds.2009-2951>  
921  
922 Jadhav, P. V., D. N. Das, K. P. Suresh, and B. R. Shome, 2018. Threshold somatic cell count  
923 for delineation of subclinical mastitis cases. *Vet World* 11(6):789-793.  
924 <https://doi.org/10.14202/vetworld.2018.789-793>.  
925  
926 Jensen, M. B. and K. L. Proudfoot, 2017. Effect of group size and health status on behavior  
927 and feed intake of multiparous dairy cows in early lactation. *J. Dairy Sci.* 100:9759–9768.  
928 <https://doi.org/10.3168/jds.2017-13035>  
929  
930 Jensen, M. B., L. Munksgaard, L.J. Pedersen, J. Ladewig, and L. Matthews, 2004. Prior  
931 deprivation and reward duration affect the demand function for rest in dairy heifers. *Appl.*  
932 *Anim. Behav. Sci.* 88:1–11. <https://doi.org/10.1016/j.applanim.2004.02.019>  
933  
934 Jensen, M. B., L. J. Pederson, and L. Munksgaard, 2005. The effect of reward duration on  
935 demand functions for rest in dairy heifers and lying requirements as measured by demand  
936 functions. *Appl. Anim. Behav. Sci.* 90:207–217.  
937 <https://doi.org/10.1016/j.applanim.2004.08.006>  
938  
939 Joshi, V., V. K. Gupta, A. G. Bhanuprakash, R. S. K. Mandal, U. Dimri, and Y. Ajith, 2018.  
940 Haptoglobin and serum amyloid A as putative biomarker candidates of naturally occurring  
941 bovine respiratory disease in dairy calves. *Microb. Pathog.* 116:33-37.  
942 <https://doi.org/10.1016/j.micpath.2018.01.001>  
943  
944 Kauppi, J. J., 2014. Dairy cow behaviour in relation to health, welfare and milking. Doctoral  
945 Dissertation, MTT Agrifood Research Finland and University of Helsinki, Faculty of  
946 Veterinary Medicine. <https://core.ac.uk/reader/52252554>  
947  
948 Kent, S., R. M. Bluthé, K. W. Kelley, and R. Dantzer, 1992. Sickness behavior as a new  
949 target for drug development. *Trends in Pharmacol. Sci.* 13:24-28.  
950 [https://doi.org/10.1016/0165-6147\(92\)90012-U](https://doi.org/10.1016/0165-6147(92)90012-U)  
951  
952 Kester, H. J., D. E. Sorter, and J. S. Hogan, 2015. Activity and milk compositional changes  
953 following experimentally induced *Streptococcus uberis* bovine mastitis. *J. Dairy Sci.*  
954 98(2):999-1004. <https://doi.org/10.3168/jds.2014-8576>  
955  
956 King, M. T. M., S. J. LeBlanc, E. A. Pajor, T. C. Wright, and T. J. DeVries, 2018. Behavior  
957 and productivity of cows milked in automated systems before diagnosis of health disorders in  
958 early lactation. *J. Dairy Sci.* 101:4343–4356. <https://doi.org/10.3168/jds.2017-13686>  
959  
960 Kirby, K. N. and D. Gerlanc, 2013. BootES: An R package for bootstrap confidence intervals  
961 on effect sizes. *Behav. Res.* 45:905–927. <https://doi.org/10.3758/s13428-013-0330-5>  
962  
963 Kováč, G., C. Tóthová, O. Nagy, O., and H. Seidel, 2011. Milk amyloid A and selected  
964 serum proteins in cows suffering from mastitis. *Acta Vet. Brno* 80:3–9.  
965 <https://doi.org/10.2754/avb201180010003>  
966

- 967 Kovačević-Filipović, M., V. Ilić, Z. Vujčić, B. Dojnov, M. Stevanov-Pavlović, Z. Mijačević,  
968 and T. Božić, 2012. Serum amyloid A isoforms in serum and milk from cows with  
969 *Staphylococcus aureus* subclinical mastitis. *Vet. Immunol. Immunopathol.* 145(1-2):120-128.  
970 <https://doi.org/10.1016/j.vetimm.2011.10.015>  
971
- 972 Kume, S., K. Nonaka, T. Oshita, and T. Kozaka, 2010. Evaluation of drinking water intake,  
973 feed water intake and total water intake in dry and lactating cows fed silages. *Livest. Sci.*  
974 128:46–51. <https://doi.org/10.1016/j.livsci.2009.10.012>  
975
- 976 Kyriazakis, I. and B. J. Tolkamp, 2011. Hunger and Thirst. Pages 44–57 in *Animal Welfare*,  
977 Appleby, M.C., J. A. Mench, I. A. S. Olsson, and B. O. Hughes, Eds. 2nd ed. CAB  
978 International, Wallingford, UK.  
979
- 980 Lecchi, C., F. Dilda, P. Sartorelli, and F. Ceciliani, 2012. Widespread expression of SAA and  
981 Hp RNA in bovine tissues after evaluation of suitable reference genes. *Vet. Immunol.*  
982 *Immunopathol.* 145:556-562. <https://doi.org/10.1016/j.vetimm.2011.12.017>  
983
- 984 Lee, D. K., 2016. Alternatives to P value: confidence interval and effect size. *Korean J.*  
985 *Anesthesiol.* 69(6):555-562. <https://doi.org/10.4097/kjae.2016.69.6.555>  
986
- 987 Littin, K., A. Acevedo, W. Browne, J. Edgar, M. Mendl, D. Owen, C. Sherwin, H. Würbel,  
988 and C. J. Nicol, 2008. Towards humane end points: Behavioural changes precede clinical  
989 signs of disease in a Huntington’s disease model. *Proc. Biol. Sci.* 275:1865–1874.  
990 <https://doi.org/10.1098/rspb.2008.0388>  
991
- 992 Llonch, P., E. Mainau, I. R. Ipharraguerre, F. Bargo, G. Tedó, M. Blanch, and X. Manteca,  
993 2018. Chicken or the egg: The reciprocal association between feeding behavior and animal  
994 welfare and their impact on productivity in dairy cows. *Front. Vet. Sci.* 5:305.  
995 <https://doi.org/10.3389/fvets.2018.00305>  
996
- 997 Lomb, J., H. W. Neave, D. M. Weary, S. J. LeBlanc, J. M. Huzzey, and M. A. G. von  
998 Keyserlingk, 2018. Changes in feeding, social, and lying behaviors in dairy cows with  
999 metritis following treatment with a nonsteroidal anti-inflammatory drug as adjunctive  
1000 treatment to an antimicrobial. *J. Dairy Sci.* 101(5):4400-4411.  
1001 <https://doi.org/10.3168/jds.2017-13812>  
1002
- 1003 Lukas, J. M., J. K. Reneau, and J. G. Linn, 2008. Water intake and dry matter intake changes  
1004 as a feeding management tool and indicator of health and estrus status in dairy cows. *J. Dairy*  
1005 *Sci.* 91(9):3385-3394. <https://doi.org/10.3168/jds.2007-0926>  
1006
- 1007 Mandel, R., H. R. Whay, C. J. Nicol, and E. Klement, 2013. The effect of food location, heat  
1008 load, and intrusive medical procedures on brushing activity in dairy cows. *J. Dairy Sci.*  
1009 96:6506–6513. <https://doi.org/10.3168/jds.2013-6941>  
1010
- 1011 Mandel, R., C. J. Nicol, H. R. Whay, and E. Klement, 2017. Short communication: Detection  
1012 and monitoring of metritis in dairy cows using an automated grooming device. *J. Dairy Sci.*  
1013 100:5724-5728. <https://doi.org/10.3168/jds.2016-12201>  
1014
- 1015 Manson, F. J. and M. C. Appleby, 1990. Spacing of dairy cows at a food trough. *Appl. Anim.*  
1016 *Behav. Sci.* 26:69-81. [https://doi.org/10.1016/0168-1591\(90\)90088-U](https://doi.org/10.1016/0168-1591(90)90088-U)

- 1017  
1018 Madouasse, A., J. N. Huxley, W. J. Browne, A. J. Bradley, and M. J. Green, 2010. Somatic  
1019 cell count dynamics in a large sample of dairy herds in England and Wales. *Prev. Vet. Med.*  
1020 96:56–64. <https://doi.org/10.1016/j.prevetmed.2010.05.005>  
1021  
1022 McConnachie, E., A. M. C. Smid, A. J. Thompson, D. M. Weary, M. A. Gaworski, and M. A.  
1023 G. Von Keyserlingk, 2018. Cows are highly motivated to access a grooming substrate. *Biol.*  
1024 *Lett.* 14:1-4. <https://doi.org/10.1098/rsbl.2018.0303>  
1025  
1026 Medrano-Galarza, C., J. Gibbons, S. Wagner, A. M. de Passillé, and J. Rushen, 2012.  
1027 Behavioral changes in dairy cows with mastitis, *J. Dairy Sci.* 95(12):6994-7002.  
1028 <https://doi.org/10.3168/jds.2011-5247>  
1029  
1030 Munksgaard, L., M. B. Jensen, L. J. Pedersen, S. W. Hansen, and L. Matthews, 2005.  
1031 Quantifying behavioural priorities - Effects of time constraints on behaviour of dairy cows,  
1032 *Bos taurus*. *Appl. Anim. Behav. Sci.* 92:3–14.  
1033 <https://doi.org/10.1016/j.applanim.2004.11.005>  
1034  
1035 Murata, H., N. Shimada, and M. Yoshioka, 2004. Current research on acute phase proteins in  
1036 veterinary diagnosis: An overview. *Vet. J.* 168:28-40. [https://doi.org/10.1016/s1090-](https://doi.org/10.1016/s1090-0233(03)00119-9)  
1037 [0233\(03\)00119-9](https://doi.org/10.1016/s1090-0233(03)00119-9)  
1038  
1039 Nakagawa, S., 2004. A farewell to Bonferroni: the problems of low statistical power and  
1040 publication bias. *Behav. Ecol.* 15(6):1044–1045. <https://doi.org/10.1093/beheco/arl107>  
1041  
1042 Nakagawa, S. and I. C. Cuthill, 2007. Effect size, confidence interval and statistical  
1043 significance: a practical guide for biologists. *Biol. Rev.* 82:591–605.  
1044 <https://doi.org/10.1111/j.1469-185x.2007.00027.x>  
1045  
1046 Nakagawa, S. and T. M. Foster, 2004. The case against retrospective statistical power  
1047 analyses with an introduction to power analysis, *Acta Ethol.* 7:103–108.  
1048 <https://doi.org/10.1007/s10211-004-0095-z>  
1049  
1050 Napolitano, F., U. Knierim, F. Grasso, and G. De Rosa, 2009. Positive indicators of cattle  
1051 welfare and their applicability to on-farm protocols. *Ital. J. Anim. Sci.* 8 (s1):355-365.  
1052 <https://doi.org/10.4081/ijas.2009.s1.355>  
1053  
1054 Nazifi, S., A. Khoshvaghti, and H. R. Gheisari, 2008. Evaluation of serum and milk amyloid  
1055 A in some inflammatory diseases of cattle. *Iranian J. Vet. Res.* 9(3):222-226.  
1056  
1057 Nazifi, S., M. Haghkhal, Z. Asadi, M. Ansari-Lari, M. R. Tabandeh, Z. Esmailnezhad, and  
1058 M. Aghamir, 2011. Evaluation of sialic acid and acute phase proteins (haptoglobin and serum  
1059 amyloid A) in clinical and subclinical bovine mastitis. *Pakistan Vet. J.* 31(1):55-59.  
1060  
1061 Neave H. W., J. Lomb, D. M. Weary, S. J. Leblanc, J. M. Huzzey, and M. A. G. Von  
1062 Keyserlingk, 2018. Behavioral changes before metritis diagnosis in dairy cows. *J. Dairy Sci.*  
1063 101(5):4388-4399. <https://doi.org/10.3168/jds.2017-13078>  
1064  
1065 O’Mahony, M. C., A. M. Healy, D. Harte, K. G. Walshe, P. R. Torgerson, and M. L.  
1066 Doherty, 2006. Milk amyloid A: Correlation with cellular indices of mammary inflammation

- 1067 in cows with normal and raised serum amyloid A. *Res. Vet. Sci.* 80:155–161.  
1068 <https://doi.org/10.1016/j.rvsc.2005.05.005>  
1069  
1070 Opp, M. R., 2005. Cytokines and sleep. *Sleep Med. Rev.* 9(5):355-364.  
1071 <https://doi.org/10.1016/j.smr.2005.01.002>  
1072  
1073 Patbandha, T. K., T. K. Mohanty, S. S. Layek, A. Kumaresan, and K. Behera, 2012.  
1074 Application of pre-partum feeding and social behaviour in predicting risk of developing  
1075 metritis in cross bred cows. *Appl. Anim. Behav. Sci.* 139:10-17.  
1076 <https://doi.org/10.1016/j.applanim.2012.03.014>  
1077  
1078 Prickett, J. and J. Zimmerman, 2010. The development of oral fluid-based diagnostics and  
1079 applications in veterinary medicine. *Animal Health Res. Rev.* 11:1–10.  
1080 <https://doi.org/10.1017/S1466252310000010>  
1081  
1082 Proudfoot, K. L., J. M. Huzzey, and M. A. G. von Keyserlingk, 2009. The effect of dystocia  
1083 on the dry matter intake and behavior of Holstein cows. *J. Dairy Sci.* 92:4937–4944.  
1084 <https://doi.org/10.3168/jds.2009-2135>  
1085  
1086 Pyörälä, S., M. Hovinen, H. Simojoki, J. Fitzpatrick, P. D. Eckersall, and T. Orro, 2011.  
1087 Acute phase proteins in milk in naturally acquired bovine mastitis caused by different  
1088 pathogens. *Vet. Rec.* 168(20):535. <https://doi.org/10.1136/vr.d1120>  
1089  
1090 Rahman, M., U. Müller, H. Sauerwein, P. Heimberg, and F. Ceciliani, 2013. Investigation  
1091 of salivary acute phase proteins in calves. Pages 213-216 in *Farm Animal Proteomics*  
1092 2013, de Almeida A. et al. (eds). Wageningen Academic Publishers, Wageningen.  
1093  
1094 Sato, S., S. Sako, and A. Maeda, 1991. Social licking patterns in cattle (*Bos taurus*): influence  
1095 of environmental and social factors. *Appl. Anim. Behav. Sci.* 32:3-12.  
1096 [https://doi.org/10.1016/S0168-1591\(05\)80158-3](https://doi.org/10.1016/S0168-1591(05)80158-3)  
1097  
1098 Sato, S., K. Tatumizu, and K. Hatae, 1993. The influence of social factors on allogrooming in  
1099 cows. *Appl. Anim. Behav. Sci.* 38:235-244. [https://doi.org/10.1016/0168-1591\(93\)90022-H](https://doi.org/10.1016/0168-1591(93)90022-H)  
1100  
1101 Schirmann, K., D. M. Weary, W. Heuwieser, N. Chapinal, R. L. A. Cerri, and M. A. G. von  
1102 Keyserlingk, 2016. Short communication: Rumination and feeding behaviors differ between  
1103 healthy and sick dairy cows during the transition period. *J. Dairy Sci.* 99:9917–9924.  
1104 <https://doi.org/10.3168/jds.2015-10548>  
1105  
1106 Sepúlveda-Varas, P., D. M. Weary, and M. A. G. von Keyserlingk, 2014. Lying behavior and  
1107 postpartum health status in grazing dairy cows. *J. Dairy Sci.* 97:6334–6343.  
1108 <https://doi.org/10.3168/jds.2014-8357>  
1109  
1110 Sepúlveda-Varasa, P., K. L. Proudfoot, D. M. Weary, and M. A. G. Keyserlingk, 2016.  
1111 Changes in behaviour of dairy cows with clinical mastitis. *Appl. Anim. Behav. Sci.* 175:8-13.  
1112 <https://doi.org/10.1016/j.applanim.2014.09.022>  
1113  
1114 Siivonen, J., S. Taponen, M. Hovinen, M. Pastell, B. Joop Lensink, S. Pyörälä, and L.  
1115 Hanninen, 2011. Impact of acute clinical mastitis on cow behaviour. *Appl. Anim. Behav. Sci.*  
1116 132:101–106. <https://doi.org/10.1016/j.applanim.2011.04.005>



- 1117  
1118 Sordillo, L. M., K. Shafer-Weaver, and D. DeRosa, 1997. Immunobiology of the mammary  
1119 gland. *J. Dairy Sci.* 80:1851–1865. [https://doi.org/10.3168/jds.S0022-0302\(97\)76121-6](https://doi.org/10.3168/jds.S0022-0302(97)76121-6)  
1120  
1121 Stangaferro, M. L., R. Wijma, L. S. Caixeta, M. A. Al-Abri, and J. O. Giordano, 2016. Use of  
1122 rumination and activity monitoring for the identification of dairy cows with health disorders.  
1123 Part II. Mastitis. *J. Dairy Sci.* 99:7411–7421. <https://doi.org/10.3168/jds.2016-10907>  
1124  
1125 Steensels, M., E. Maltz, C. Bahr, D. Berckmans, A. Antler, and I. Halachmi, 2017. Towards  
1126 practical application of sensors for monitoring animal health: the effect of post-calving health  
1127 problems on rumination duration, activity and milk yield. *J. Dairy Res.* 84:132–138.  
1128 <https://doi.org/10.1017/S0022029917000176>  
1129  
1130 Ternman, E., L. Hänninen, M. Pastell, S. Agenäs, and P. Nielsen, 2013. Sleep in dairy cows  
1131 recorded with a non-invasive EEG technique. *Appl. Anim. Behav. Sci.* 140:25-32.  
1132 <https://doi.org/10.1016/j.applanim.2012.05.005>  
1133  
1134 Tizard, L., 2008. Sickness behavior, its mechanisms and significance. *Anim. Health Res.*  
1135 *Rev.* 9:87-99. <https://doi.org/10.1017/S1466252308001448>  
1136  
1137 Toaff-Rosenstein, R. L. and C. B. Tucker, 2018. The sickness response at and before clinical  
1138 diagnosis of spontaneous bovine respiratory disease. *Appl. Anim. Behav. Sci.* 201:85-92.  
1139 <https://doi.org/10.1016/j.applanim.2018.01.002>  
1140  
1141 • Toaff-Rosenstein, R. L., L. J. Gershwin, A. J. Zanella, and C. B. Tucker, 2016. The sickness  
1142 response in steers with induced bovine respiratory disease before and after treatment with  
1143 a non-steroidal anti-inflammatory drug. *Appl. Anim. Behav. Sci.* 181:49-62.  
1144 <https://doi.org/10.1016/j.applanim.2016.05.016>  
  
1145  
1146 Val-Laillet, D., A. M. de Passille, J. Rushen, and M. A. G. von Keyserlingk, 2008. The  
1147 concept of social dominance and the social distribution of feeding-related displacements  
1148 between cows. *Appl. Anim. Behav. Sci.* 111:158–172.  
1149 <https://doi.org/10.1016/j.applanim.2007.06.001>  
1150  
1151 Veissier, I., P. Le Neindre, and G. Trillat, 1989. The use of circadian behaviour to measure  
1152 adaptation of calves to changes in their environment. *Appl. Anim. Behav. Sci.* 22:1-12.  
1153 [https://doi.org/10.1016/0168-1591\(89\)90075-0](https://doi.org/10.1016/0168-1591(89)90075-0)  
1154  
1155 Veissier I., M. M. Mialon, and K. H. Sloth, 2017. Short communication: Early modification  
1156 of the circadian organization of cow activity in relation to disease or estrus. *J. Dairy Sci.*  
1157 100:3969–3974. <https://doi.org/10.3168/jds.2016-11853>  
1158  
1159 Verbeke, J., S. Piepers, K. Supré, and S. De Vliegher, 2014. Pathogen-specific incidence rate  
1160 of clinical mastitis in Flemish dairy herds, severity, and association with herd hygiene. *J.*  
1161 *Dairy Sci.* 97:6926–6934. <https://doi.org/10.3168/jds.2016-11853>  
1162  
1163 von Keyserlingk, M.A.G. and D. M. Weary, 2010. Review: Feeding behaviour of dairy cattle:  
1164 Measures and applications. *Can. J. Anim. Sci.* 90(3):303-309.  
1165 <https://doi.org/10.4141/CJAS09127>

1166

1167 Wagner, N., V. Antoine, M. M. Mialon, R. Lardy, M. Silberberg, J. Koko, and I. Veissier,  
1168 2020. Machine learning to detect behavioural anomalies in dairy cows under subacute  
1169 ruminal acidosis. *Comput. Electron. Agric.* 170:105233.  
1170 <https://doi.org/10.1016/j.compag.2020.105233>

1171

1172 Weary, D. M., L. Niel, F. C. Flower, and D. Fraser, 2006. Identifying and preventing pain in  
1173 animals. *Appl. Anim. Behav. Sci.* 100(1-2):64-76.  
1174 <https://doi.org/10.1016/j.applanim.2006.04.013>

1175

1176 Weary, D. M., J. M. Huzzey, and M. A. G. von Keyserlingk, 2009. Using behavior to predict  
1177 and identify ill health in animals. *J. Anim. Sci.* 87:770–777. <https://doi.org/10.2527/jas.2008-1297>

1178

1179 Weigele, H. C., L. Gygax, A. Steiner, B. Wechsler, and J. B. Burla, 2017. Moderate lameness  
1181 leads to marked behavioral changes in dairy cows. *J. Dairy Sci.* 101:2370–2382.  
1182 <https://doi.org/10.3168/jds.2017-13120>

1183

1184 Yeiser, E. E., K. E. Leslie, M. L. McGilliard, and C. S. Petersson-Wolfe, 2012. The effects of  
1185 experimentally induced *Escherichia coli* mastitis and flunixin meglumine administration on  
1186 activity measures, feed intake, and milk parameters. *J. Dairy Sci.* 95:4939–4949.  
1187 <https://doi.org/10.3168/jds.2011-5064>

1188

1189

1190

1191

1192

1193

1194

1195

1196

1197

1198

1199

1200

1201

1202

1203

1204

1205

1206

1207

1208

1209

1210

1211

1212

1213

1214

1215



1216 **Figure 1:** Plan of the home pen including CCTV camera position and virtual division of floor-space  
1217 (F1-13, M1/7/13, B1-13) for logging cow position. SB = salt bin, T1-3 = water troughs, B = brush  
1218

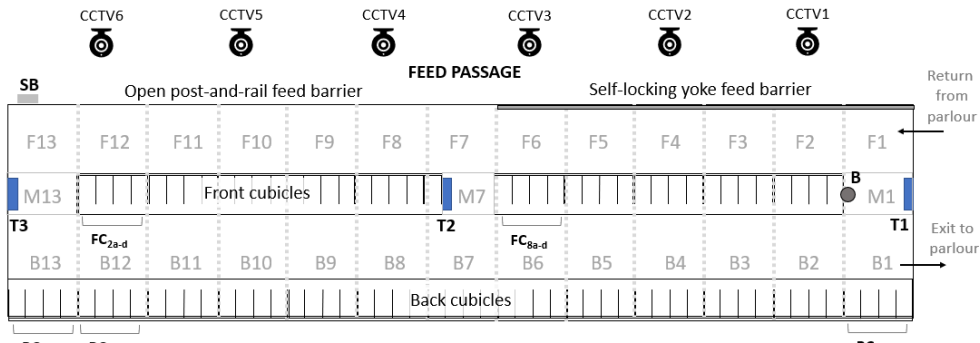

1219  
1220  
1221  
1222  
1223  
1224  
1225  
1226  
1227  
1228  
1229  
1230  
1231  
1232  
1233  
1234  
1235  
1236  
1237  
1238  
1239  
1240  
1241  
1242  
1243  
1244  
1245  
1246

1247 **Figure 2:** Diurnal differences in dairy cow behavior (grey = CTRL, black = SCM): (a) explore  
1248 environment, ‘ExpEnv’, (b) explore social, ‘ExpSoc’, (c) behavioral transitions, ‘Trans’, (d) distance  
1249 moved, ‘Dist’, (e) agonistic behavior given, ‘FocSocG’, (f) agonistic behavior received, ‘FocSocR’,  
1250 (g) all social behavior given, ‘SocG’, (h) all social behavior received, ‘SocR’. An asterisk in brackets  
1251 ‘(\*)’ denotes a statistical significance ( $P < 0.10$ ) between the two groups based upon a Wilcoxon SR  
1252 Test alone; an asterisk ‘\*’ denotes that the difference was confirmed by effect size statistics (Hedges’  
1253 g). Milking times: 06:00 - 07:00h, 14:00 - 15:00h, 22:00 - 23:00h

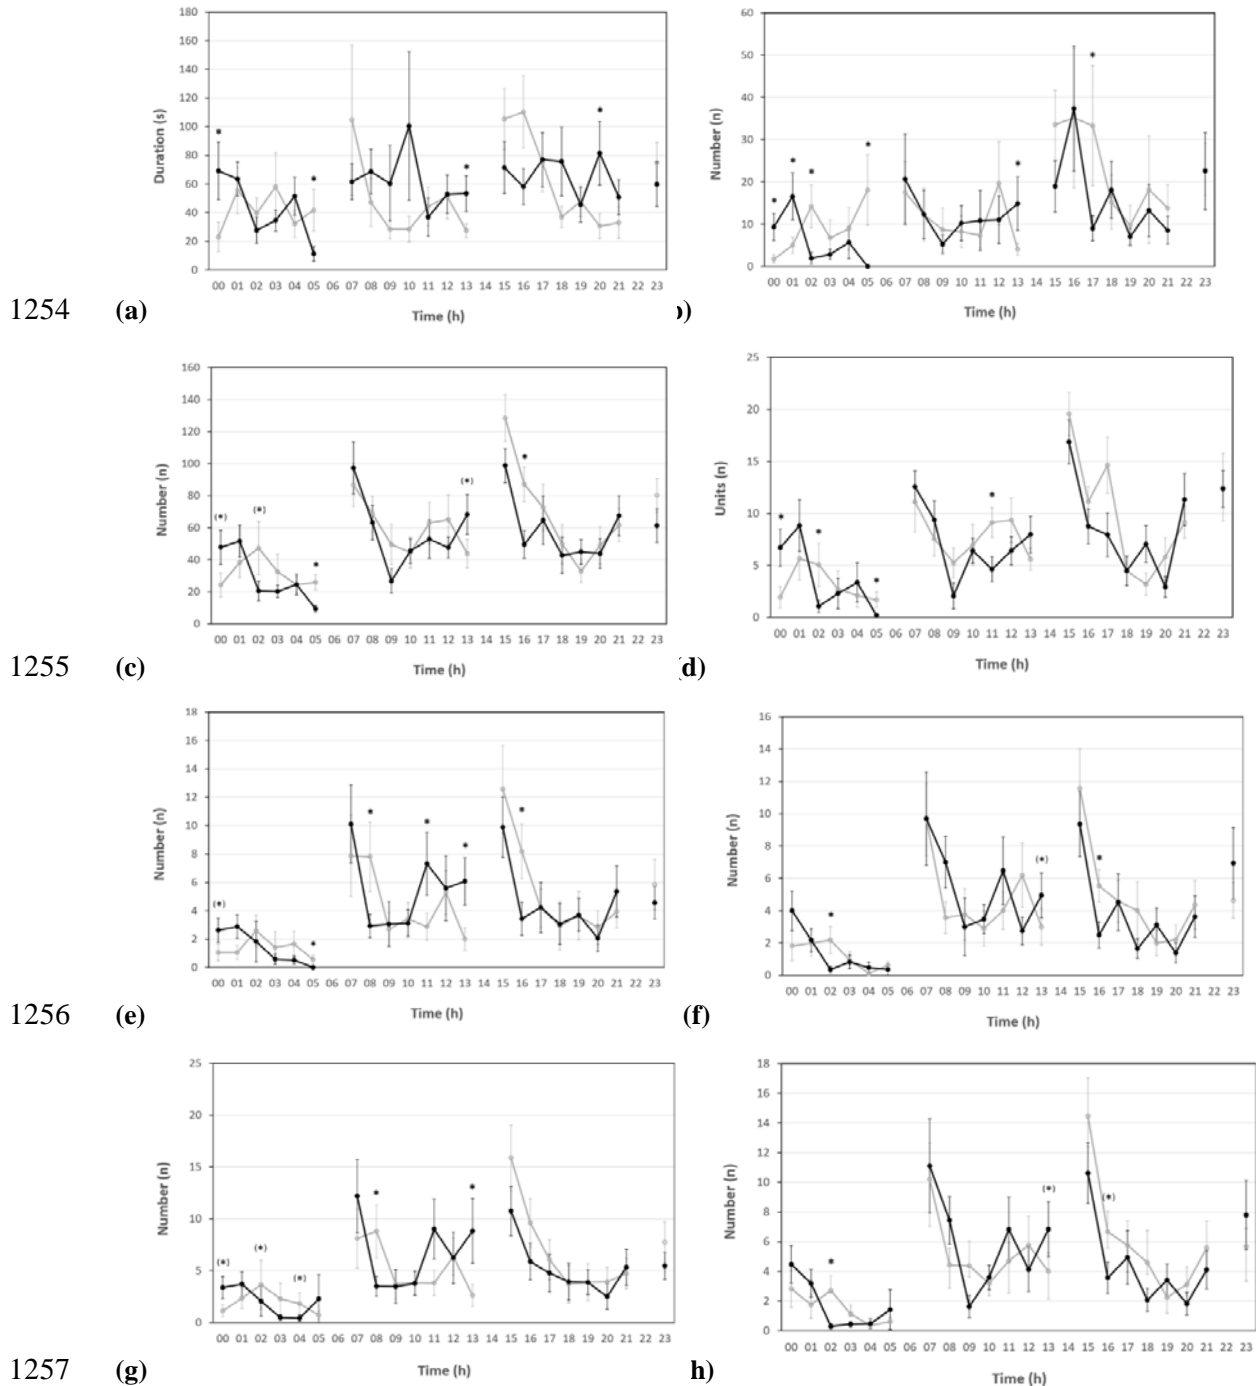

1258 **Figure 3:** Relationship between somatic cell count (SCC) in milk and salivary serum amylase-A  
1259 (SAA) in dairy cattle (n = 28)

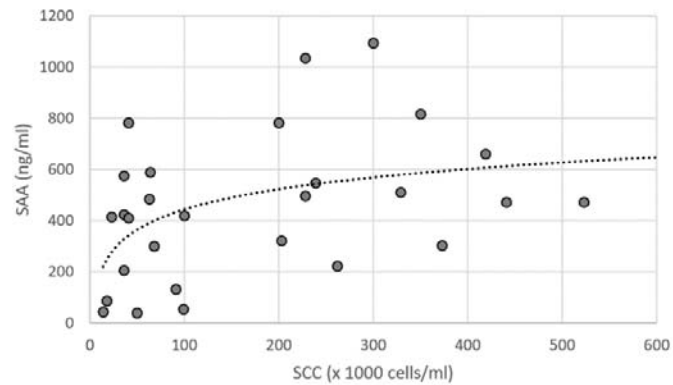

1260

1261

1262

1263

1264

1265

1266

1267

1268

1269

1270

1271

1272

1273

1274

1275

1276

1277

1278

1279

1280

1281

1282

1283

1284

1285

1286

1287

1288

1289

1290

1291

1292

1293

1294

1295

1296 **Figure 4:** Relationship between somatic cell count (SCC) and two measures of activity (grey =  
1297 CTRL, black = SCM): (a) behavioral transitions ('Trans'); (b) distance covered ('Dist').

1298 (a)

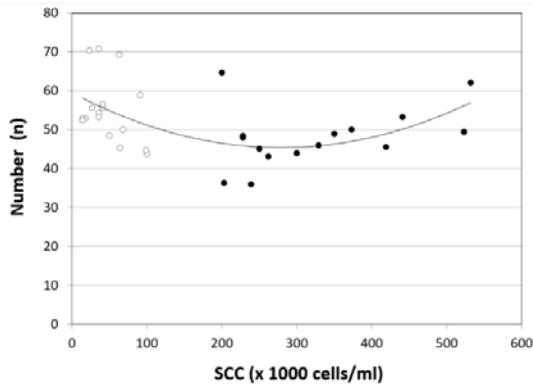

(b)

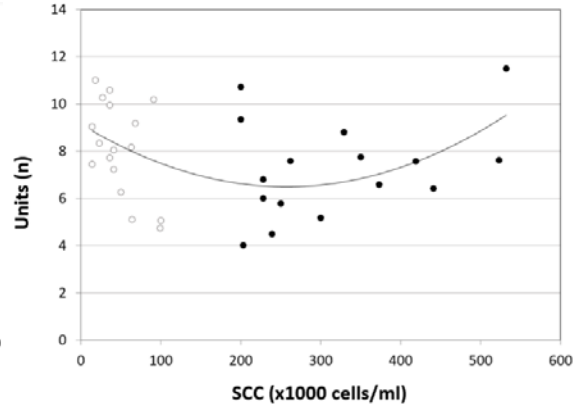

1299
